# Supplementary material for: Digital biology approach for macroscale studies of biofilm growth and biocide effects with electron microscopy
Source: Royal Society of Chemistry journal article supplement (doi:10.1039/d3dd00048f), 2023-01-01
Supplement: d3dd00048f1.pdf [file d3dd00048f1.pdf]

**Supporting information**  
*for the article*

# Digital biology approach for macroscale studies of biofilm growth and biocide effects with electron microscopy

*by*

Konstantin S. Kozlov,<sup>a,c,§</sup> Daniil A. Boiko,<sup>a,§</sup> Elena V. Detusheva,<sup>b</sup> Konstantin V. Detushev,<sup>b</sup> Evgeniy O. Pentsak,<sup>a</sup> Anatoly N. Vereshchagin,<sup>a</sup> Valentine P. Ananikov<sup>a,c,\*</sup>

<sup>a</sup> Zelinsky Institute of Organic Chemistry, Russian Academy of Sciences, Leninsky Prospekt 47, Moscow, 119991, Russia

<sup>b</sup> State Research Center for Applied Microbiology and Biotechnology, Obolensk, Moscow region, Russia

<sup>c</sup> Lomonosov Moscow State University, Chemistry Department, Leninskie Gory 1/3, Moscow, 119991, Russia

§ These authors contributed equally

\* E-mail: val@ioc.ac.ru

# Contents

|     |                                                                                                       |    |
|-----|-------------------------------------------------------------------------------------------------------|----|
| 1   | Neural network.....                                                                                   | 3  |
| 1.1 | Architecture.....                                                                                     | 3  |
| 1.2 | Optimizer.....                                                                                        | 3  |
| 1.3 | Loss functions.....                                                                                   | 3  |
| 2   | Additional model training details.....                                                                | 3  |
| 2.1 | Loss curve.....                                                                                       | 3  |
| 2.2 | Statistical significance of using a larger amount of training data.....                               | 4  |
| 3   | Model predictions.....                                                                                | 5  |
| 3.1 | Model predictions on validation samples.....                                                          | 5  |
| 3.2 | Model predictions on test samples.....                                                                | 13 |
| 3.3 | Neural network-based segmentation of cherry-picked examples.....                                      | 22 |
| 3.4 | Neural network-based predictions of a large number of SEM images for biofilm growth estimation.....   | 22 |
| 3.5 | Neural network-based predictions of large amounts of SEM images for the study of biocide effects..... | 40 |
| 4   | Additional calculation details.....                                                                   | 49 |
| 4.1 | Area calculations.....                                                                                | 49 |
| 4.2 | Cell counts.....                                                                                      | 49 |
| 4.3 | $K_1$ rate constant estimation.....                                                                   | 50 |
| 4.4 | Neural network processing time.....                                                                   | 50 |
| 4.5 | Method limitations.....                                                                               | 51 |
| 5   | Channel zone recognition.....                                                                         | 51 |
|     | References.....                                                                                       | 51 |

# 1 Neural network

Additional information about the neural network and training.

## 1.1 Architecture

We used **U-Net**<sup>1</sup>, a convolutional neural network architecture that is actively used in the segmentation of biomedical images. The network consists of the encoding and decoding parts connected with skip connections. The encoder used in the research was **ResNet34**.<sup>2</sup> The main advantage of U-Net is that it can be trained with few images.

## 1.2 Optimizer

We used the **Adam optimizer**,<sup>3</sup> one of the most widely used optimization algorithms in deep learning. The algorithm can be described as follows:

1. Accumulation of the vector of inertia using a moving average

$$m_i^{(t+1)} = \alpha m_i^{(t)} + (1 - \alpha) \nabla_i L(w^{(t)})$$

2. Accumulation of the normalization factor of the gradient step using the moving average

$$v_i^{(t+1)} = \beta v_i^{(t)} + (1 - \beta) (\nabla_i L(w^{(t)}))^2$$

3. Bias correction

$$\hat{m}_i^{(t+1)} = \frac{m_i^{(t+1)}}{1 - \alpha^t}$$

$$\hat{v}_i^{(t+1)} = \frac{v_i^{(t+1)}}{1 - \beta^t}$$

4. Weight recalculation

$$w_i^{(t+1)} = w_i^{(t)} - \frac{\eta}{\sqrt{\hat{v}_i^{(t+1)} + \epsilon}} \hat{m}_i^{(t+1)}$$

## 1.3 Loss functions

As described in the “Methods” section, we used a linear combination of **Binary Cross Entropy** and **Dice coefficient** as our loss function. Mathematical formulas are shown below:

$$BCE(y, \hat{p}) = -y \log \hat{p} + (1 - y) \log(1 - \hat{p})$$

$$Dice(y, \hat{p}) = 1 - \frac{2y\hat{p} + 1}{y + \hat{p} + 1}$$

# 2 Additional model training details

## 2.1 Loss curve

Here, we report the validation loss and IOU curves of the final network.

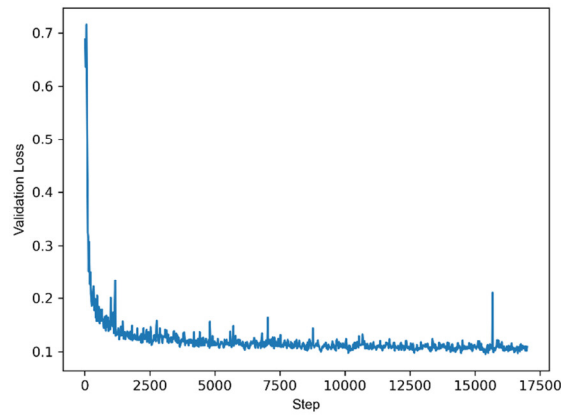

Figure 1. Validation loss.

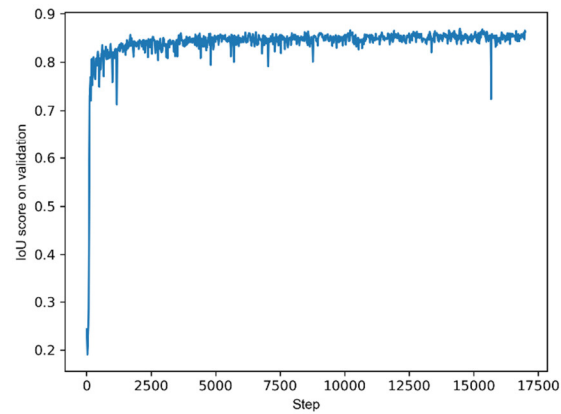

Figure 2. Intersection-over-Union Score on validation samples.

## 2.2 Statistical significance of using a larger amount of training data

Here, we show validation IoU scores for the networks trained with the same hyperparameters but with different training data (the first group of models was trained only on 4 original images, the second group was trained on 4 original images and 4 elastic transforms, and the third group was trained on 72 original images with 9 elastic transforms).

Table 1. Validation IoU scores of networks trained on different amounts of data

| Sample          | 4 original + 0 elastic transformed (group 1) | 4 original + 4 elastic transformed (group 2) | 72 original + 9 elastic transformed (group 3) |
|-----------------|----------------------------------------------|----------------------------------------------|-----------------------------------------------|
| 1               | 0.8145                                       | 0.803                                        | 0.8511                                        |
| 2               | 0.8153                                       | 0.826                                        | 0.854                                         |
| 3               | 0.7786                                       | 0.8179                                       | 0.8515                                        |
| 4               | 0.7492                                       | 0.8184                                       | 0.86                                          |
| <b>Mean IoU</b> | 0.7894                                       | 0.8163                                       | 0.8542                                        |

*Mann-Whitney U test* for group 1 and group 2:  
p-value = 0.1143

*Mann-Whitney U test* for group 2 and group 3:  
p-value = 0.02857

The results were obtained using the *wilcox.test* function in R language.

### 3 Model predictions

Here, we present neural network mapping and predictions for the images described in the article.

#### 3.1 Model predictions on validation samples

Segmentation results of the final neural network on validation.

Total IoU score for image 1 is 84.73 %

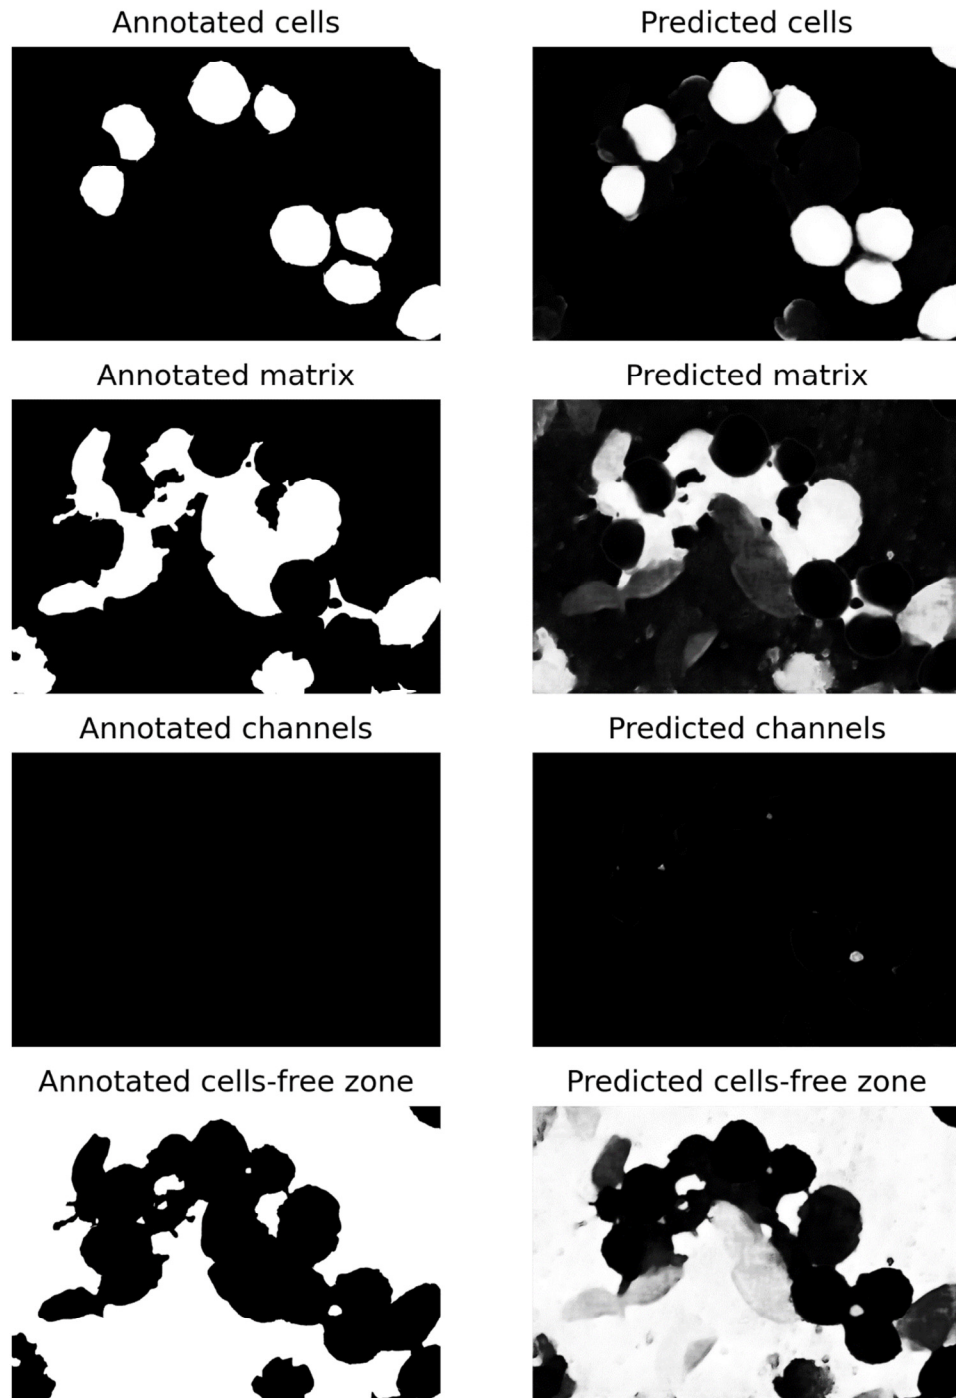

Figure 3. Model predictions on validation image 1.

Total IoU score for image 2 is 96.51 %

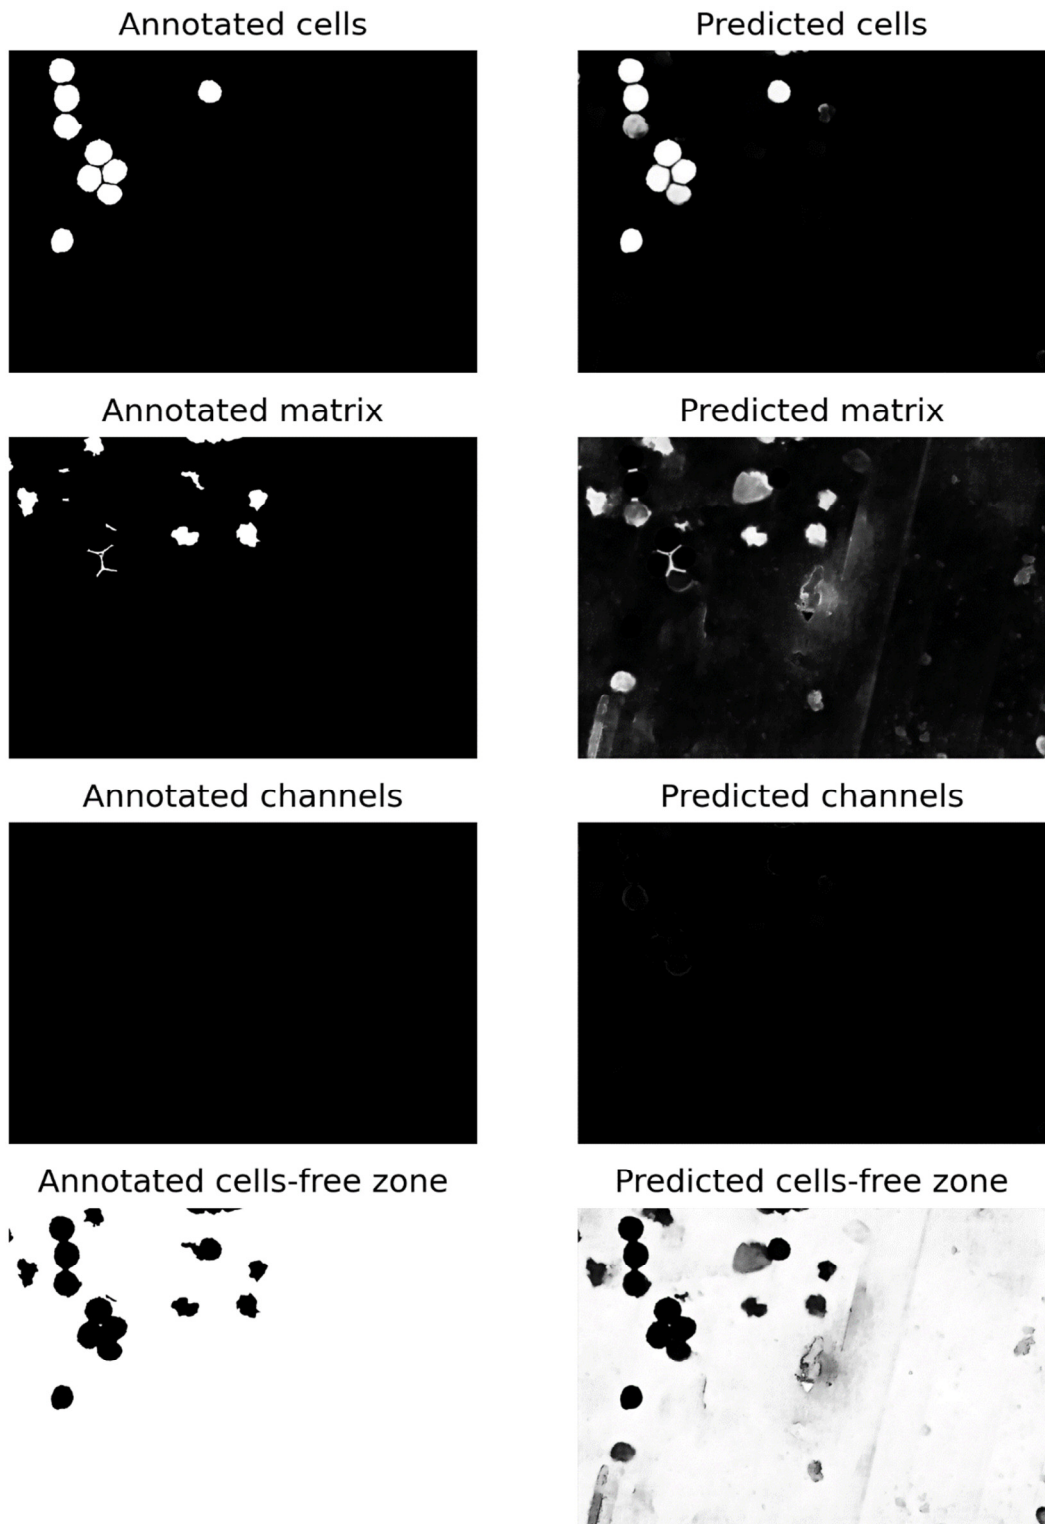

Figure 4. Model predictions on validation image 2.

Total IoU score for image 3 is 96.89 %

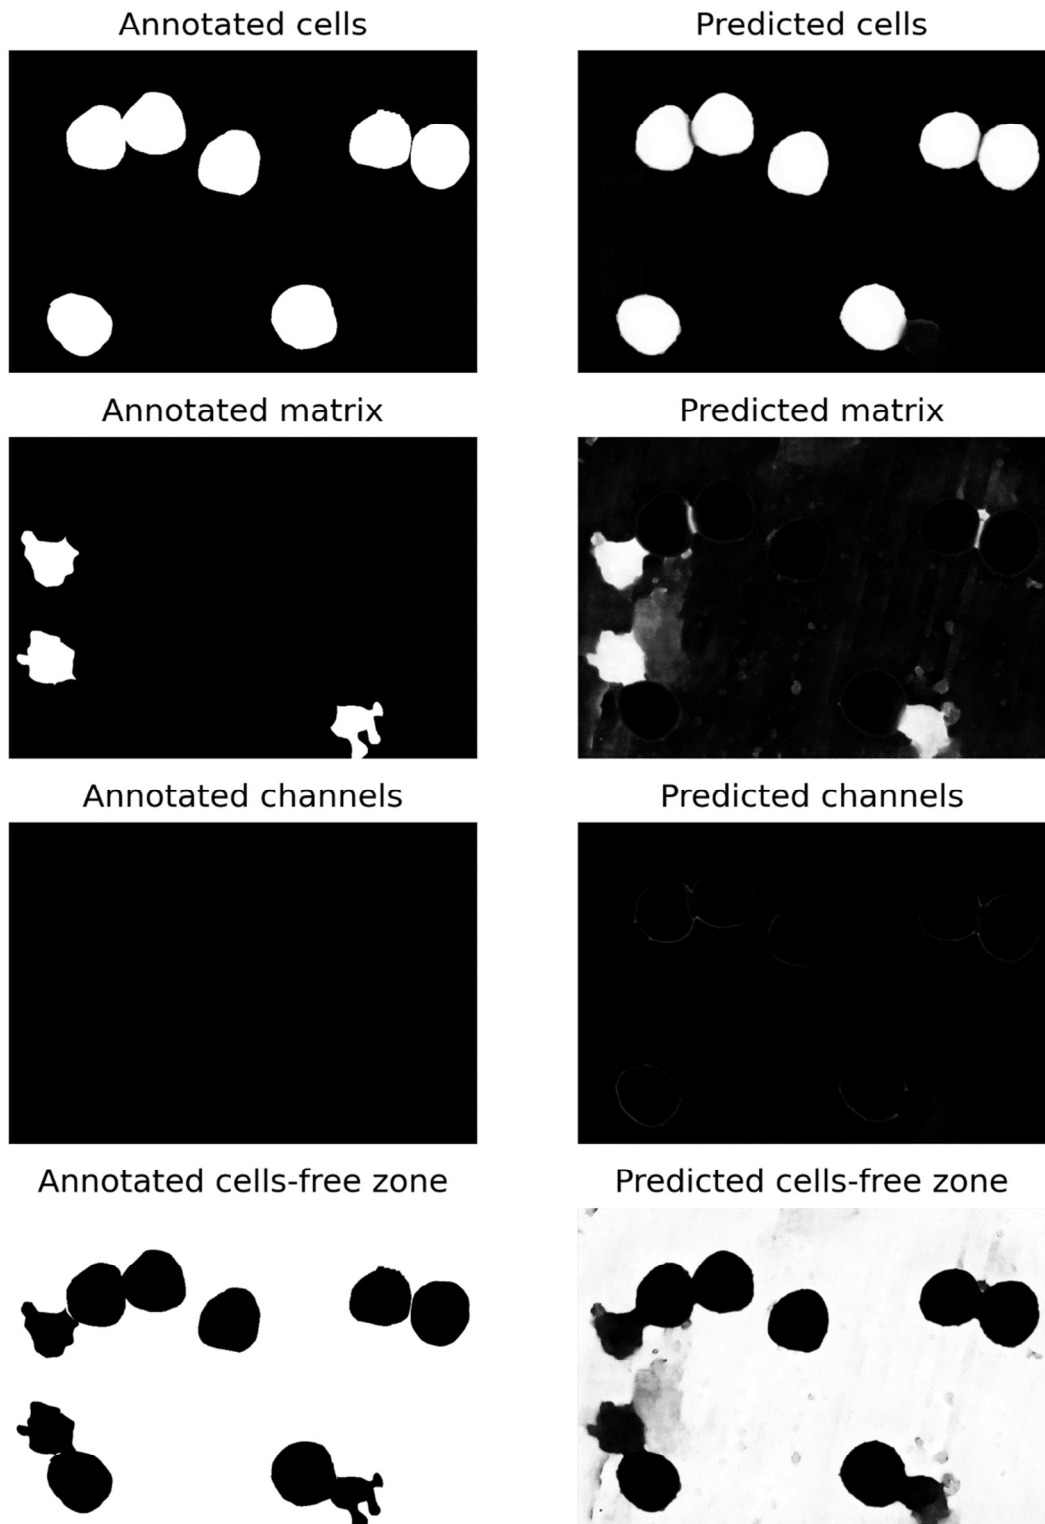

Figure 5. Model predictions on validation image 3.

Total IoU score for image 4 is 84.98 %

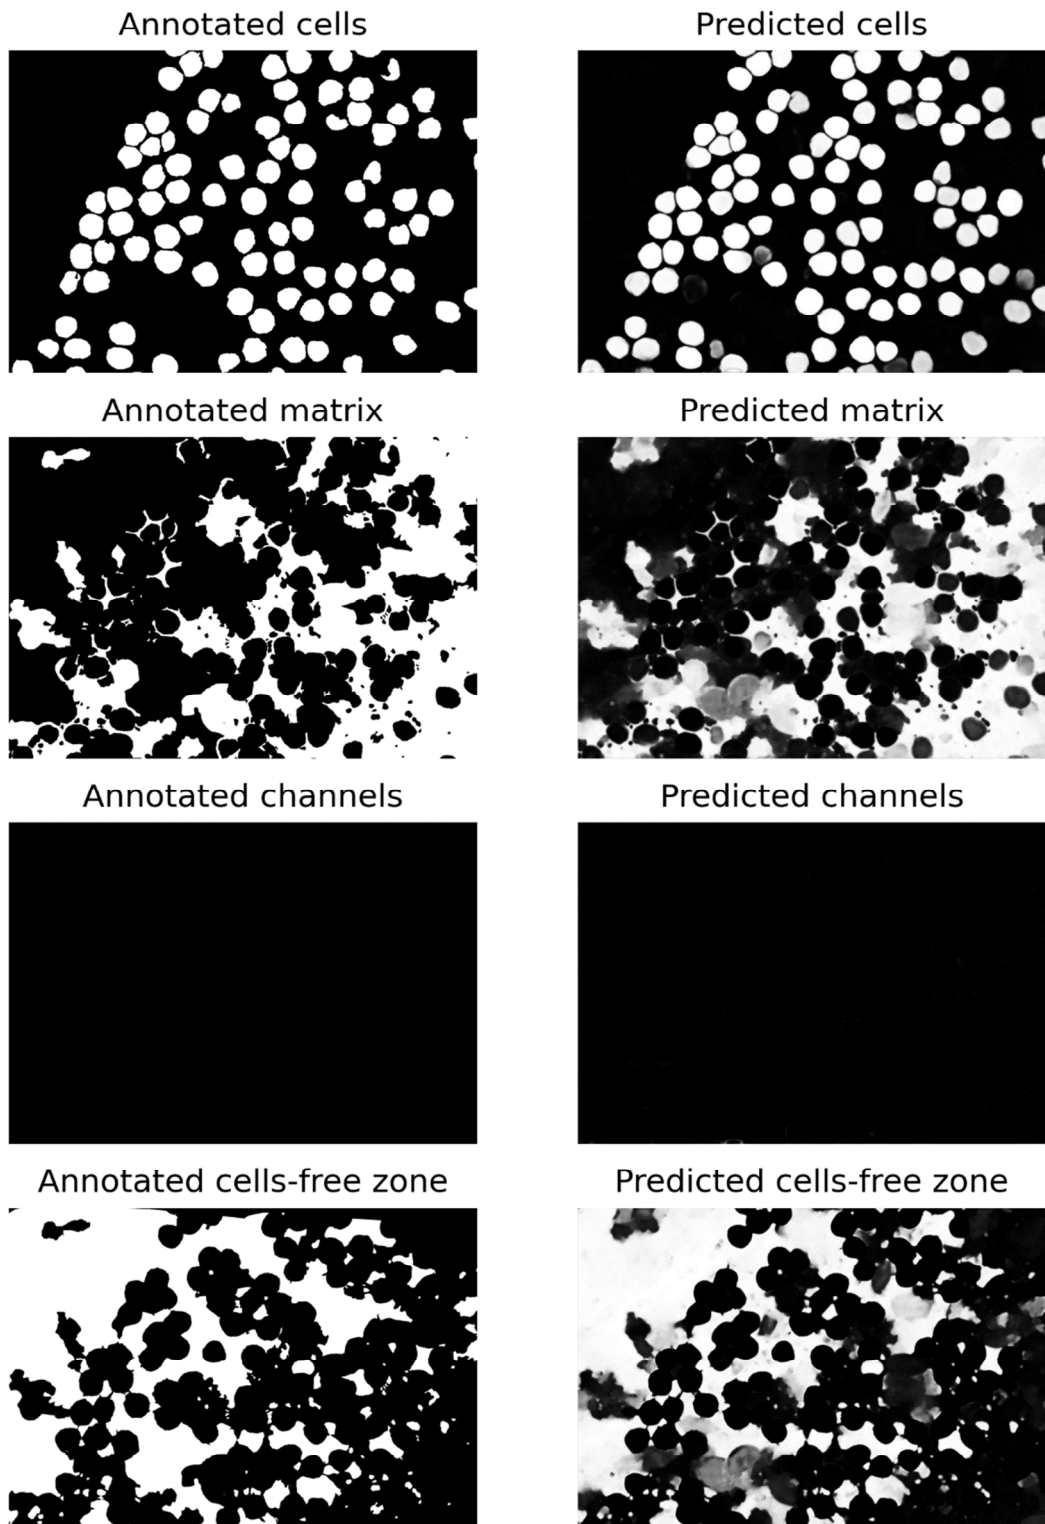

Figure 6. Model predictions on validation image 4.



Total IoU score for image 5 is 80.57 %

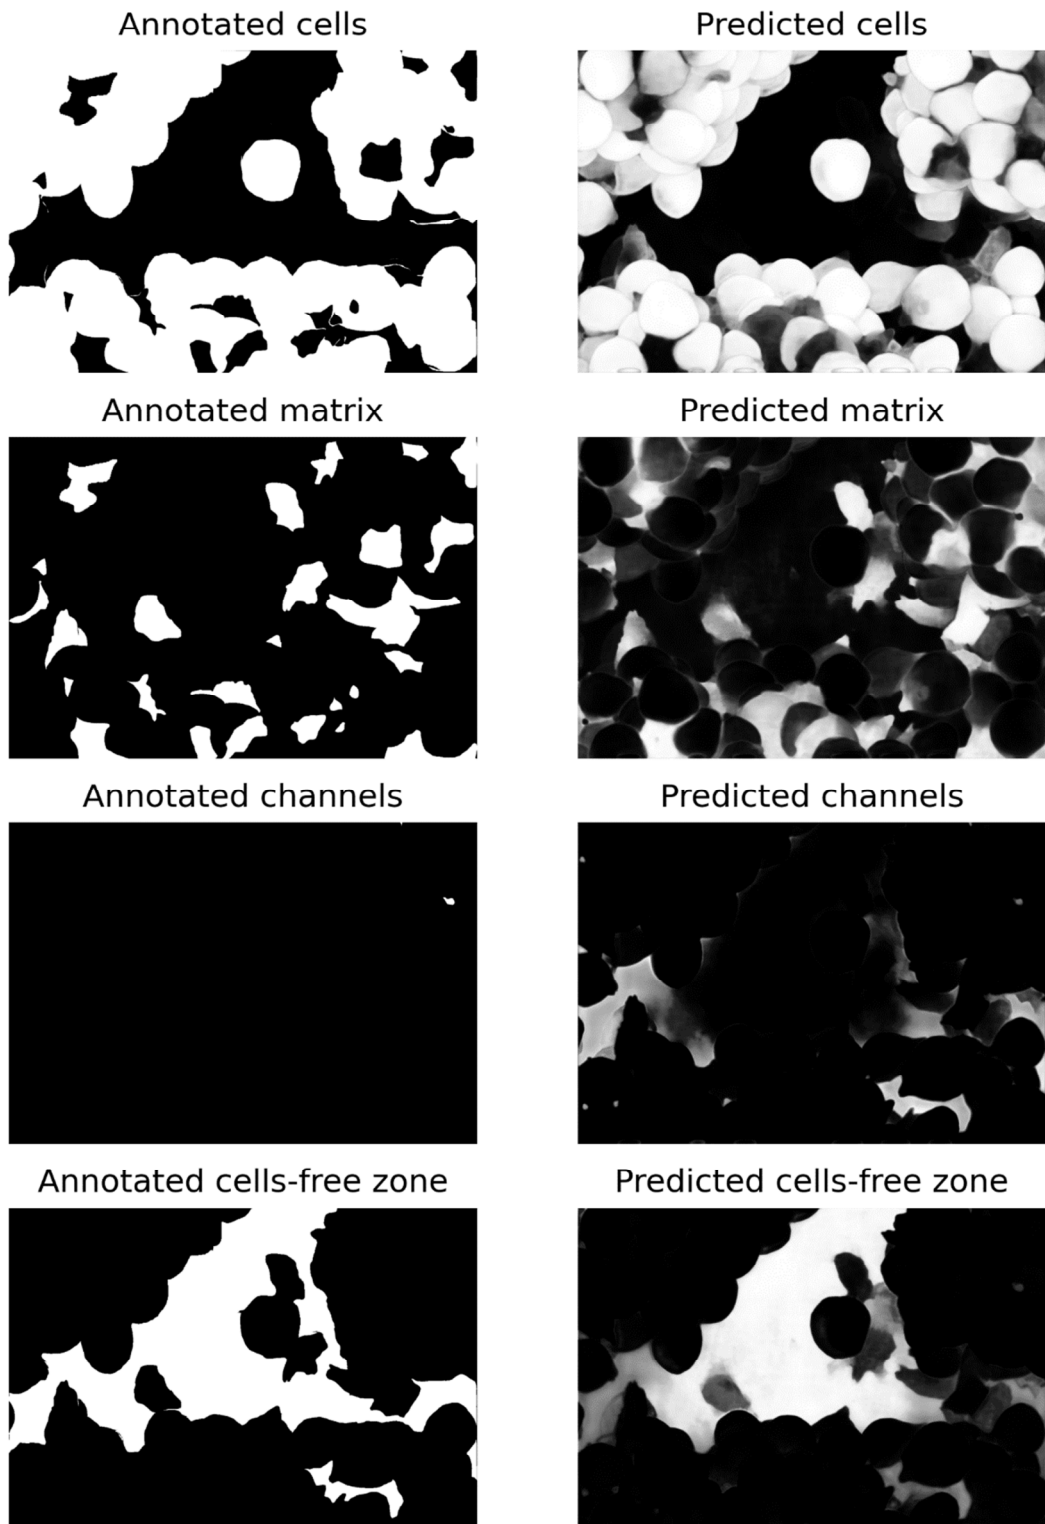

Figure 7. Model prediction on validation image 5.

Total IoU score for image 6 is 87.84 %

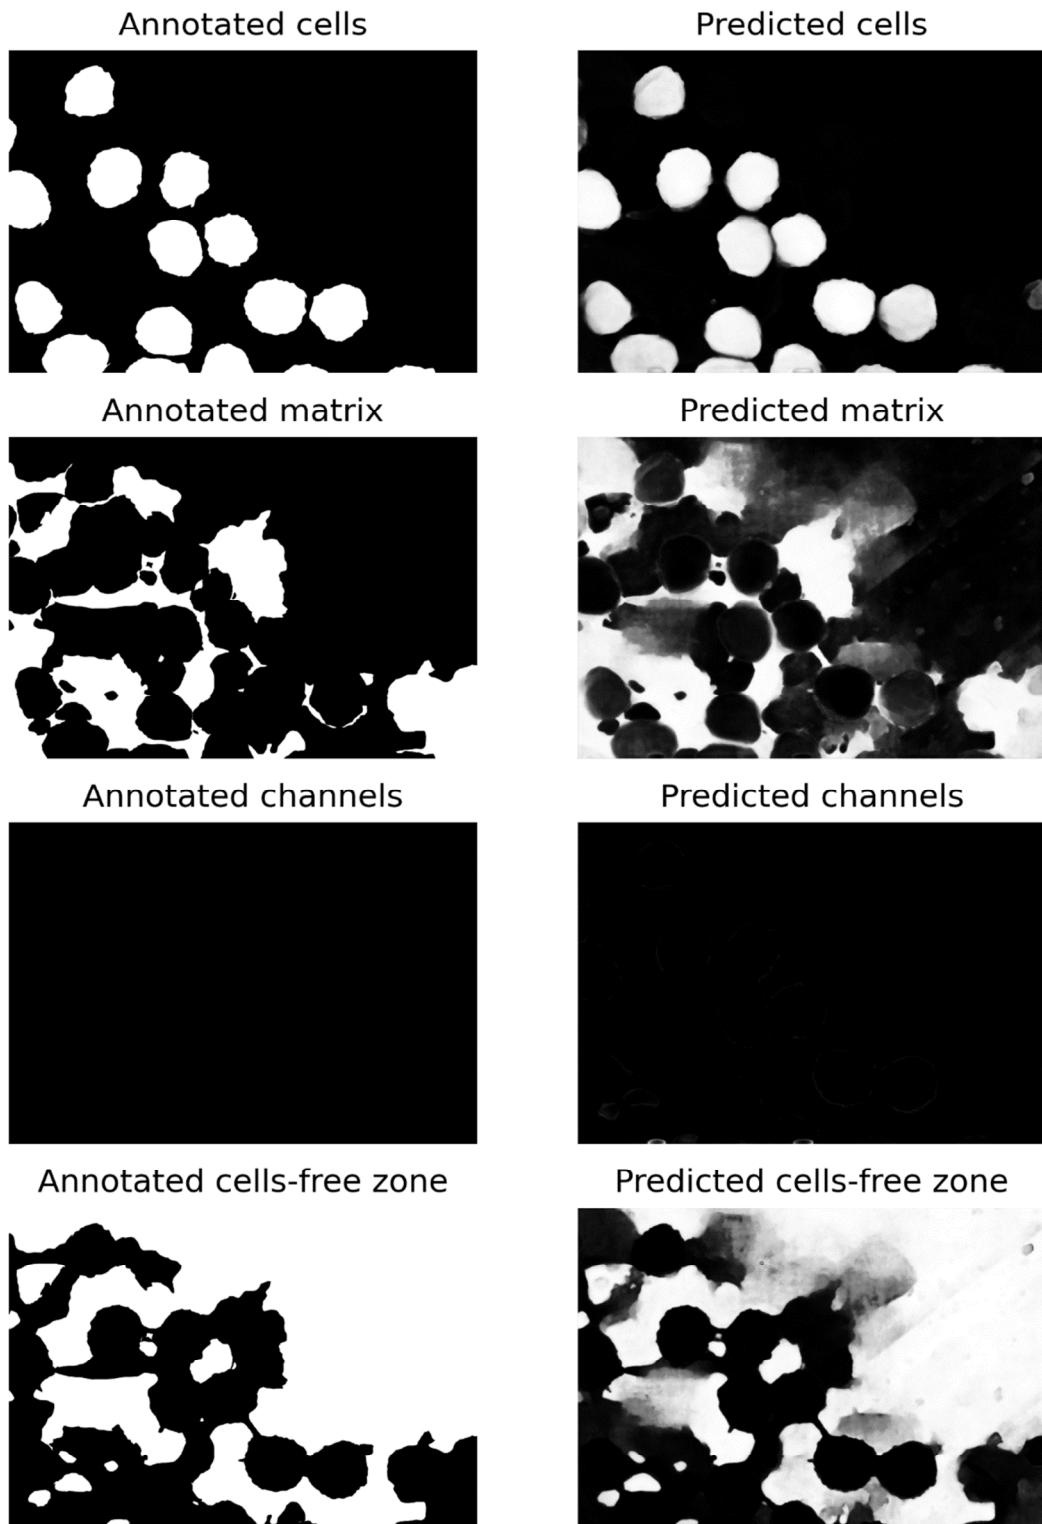

Figure 8. Model predictions on validation image 6.

Total IoU score for image 7 is 82.78 %

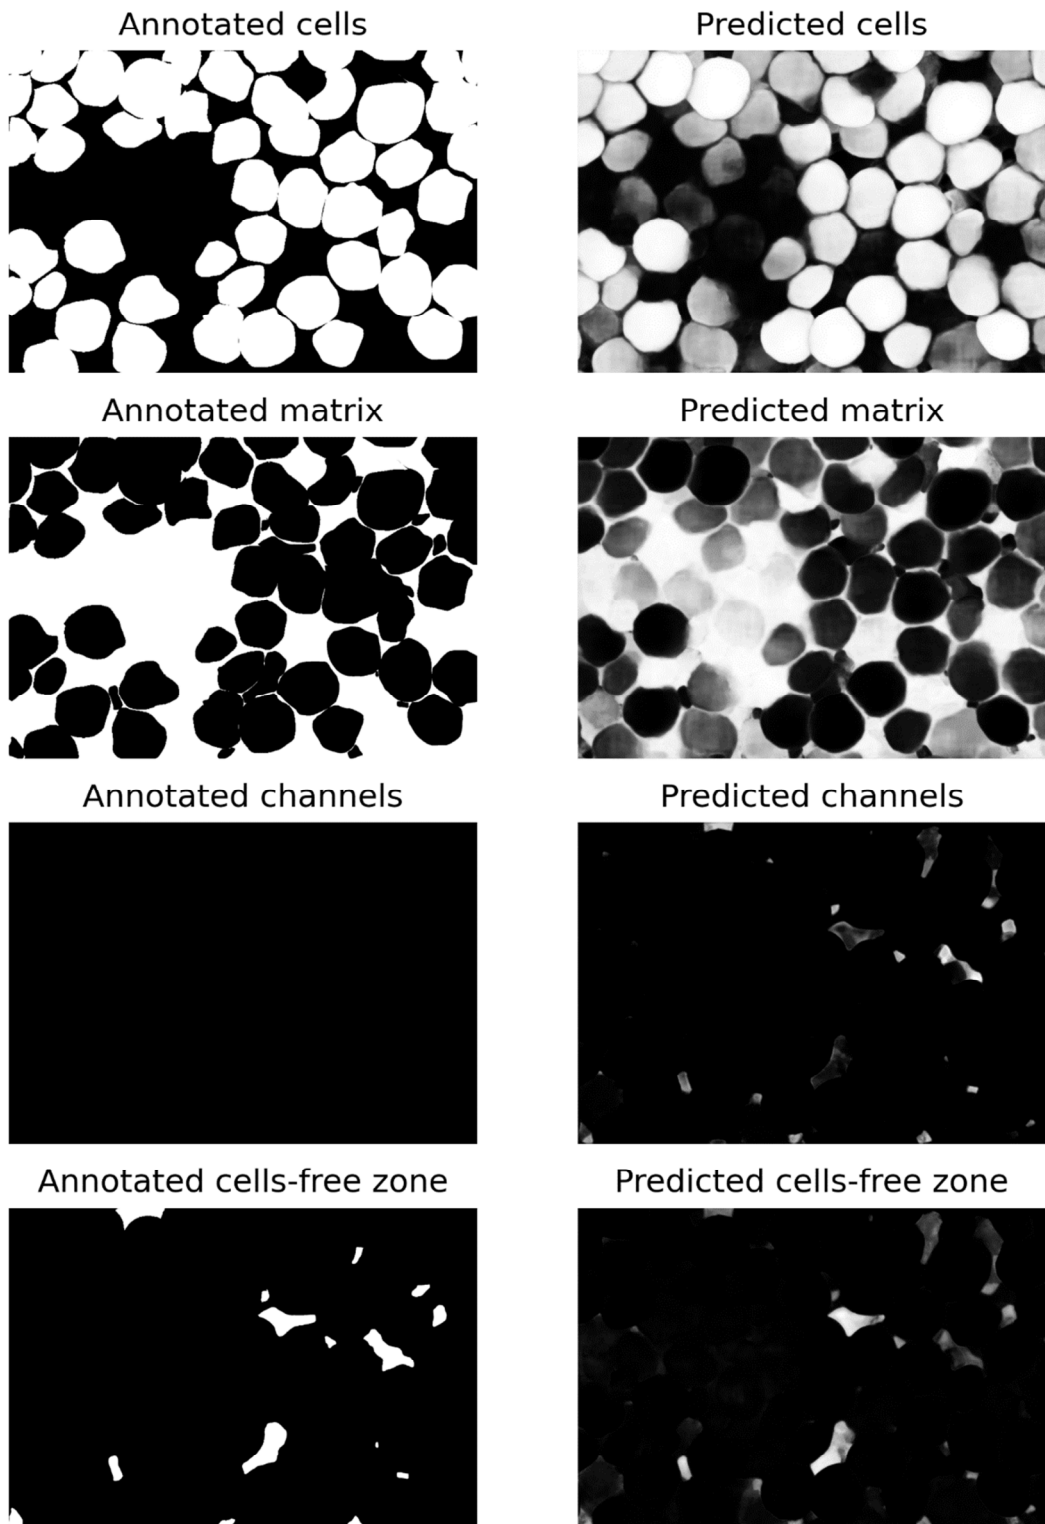

Figure 9. Model predictions on validation image 7.

Total IoU score for image 8 is 75.76 %

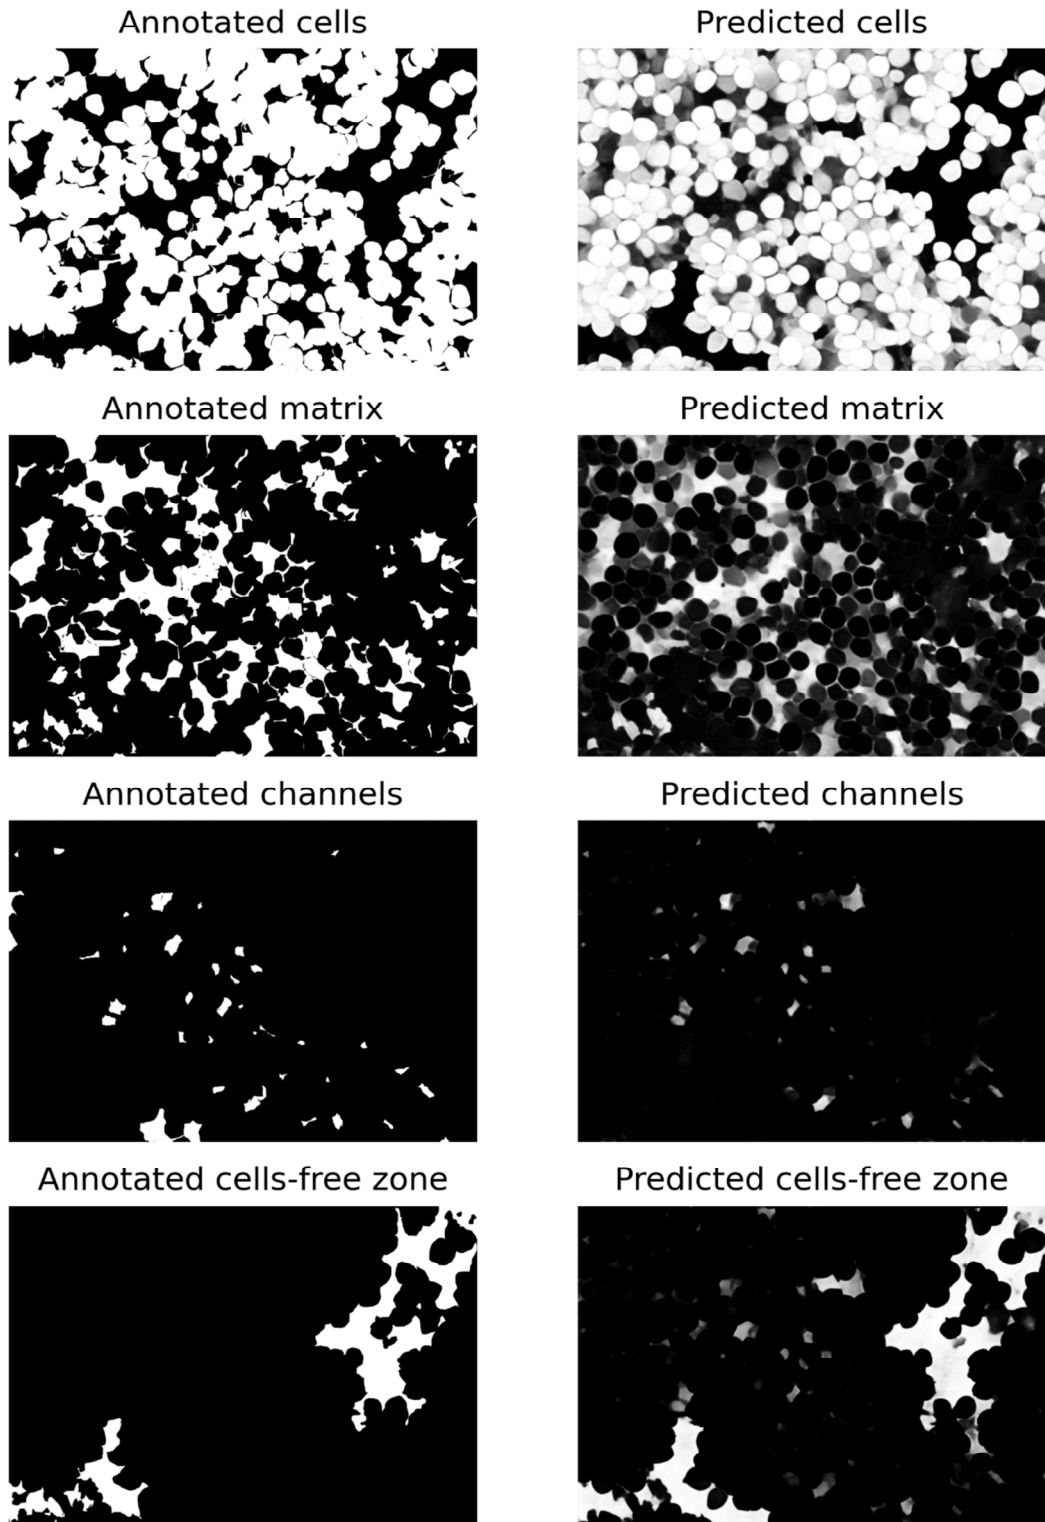

Figure 10. Model prediction on validation image 8.

### 3.2 Model predictions on test samples

Segmentation results of the final neural network on test.

Total IoU score for image 1 is 71.82 %

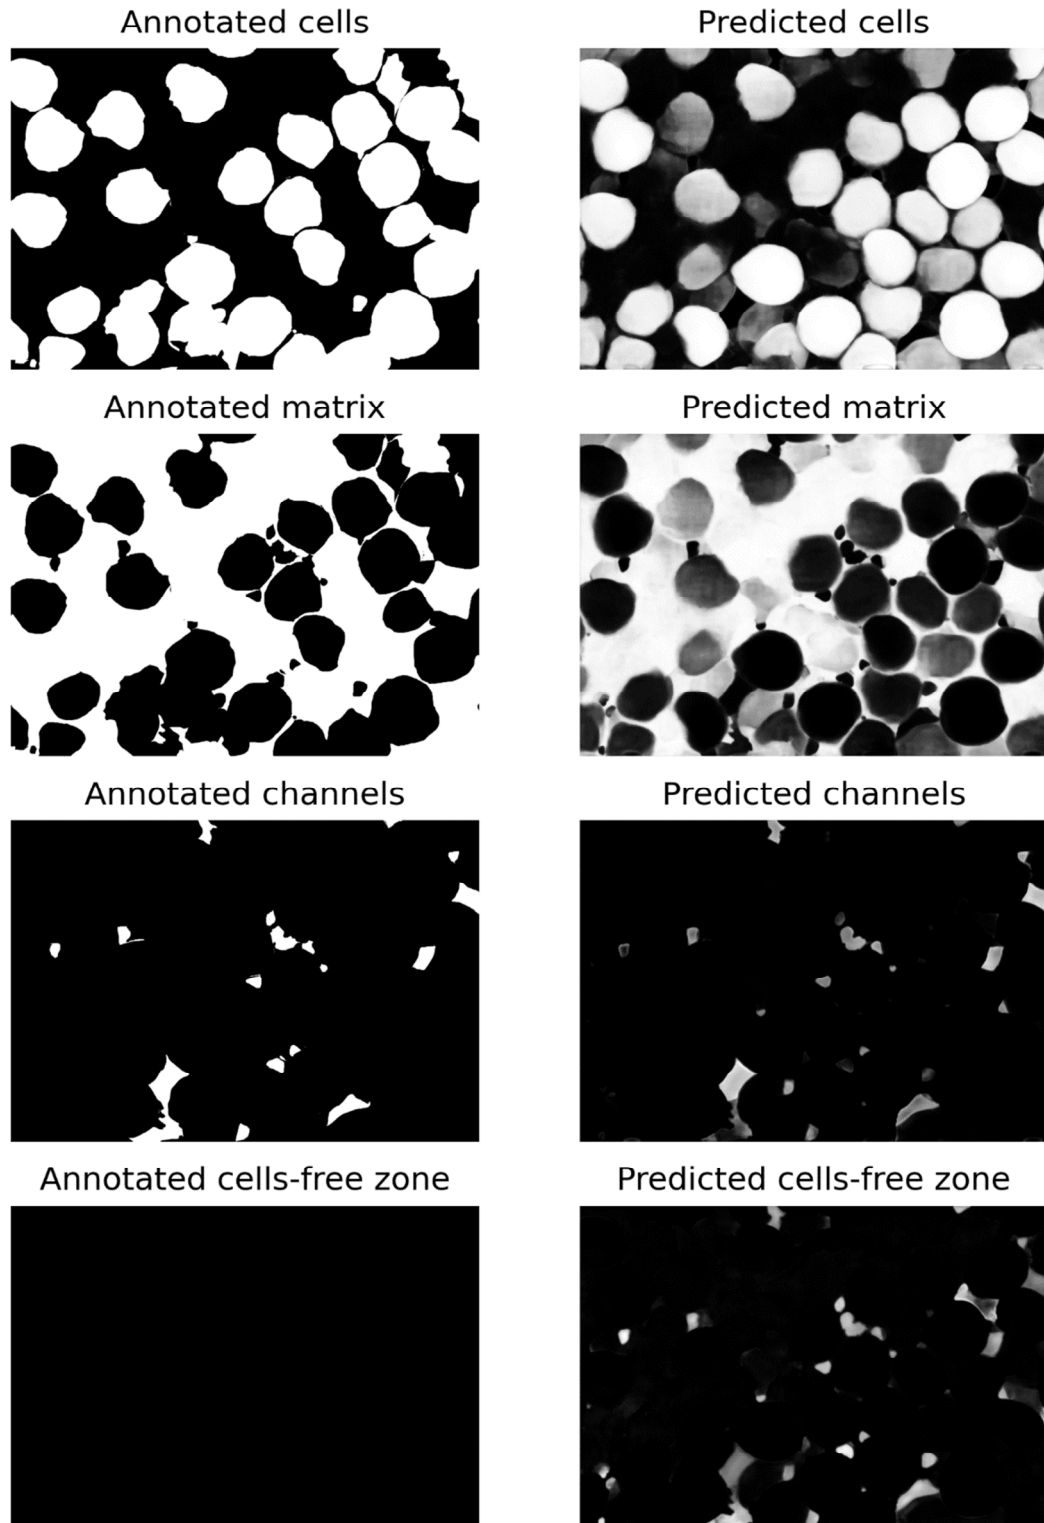

Figure 11. Model predictions on test image 1.

Total IoU score for image 2 is 80.97 %

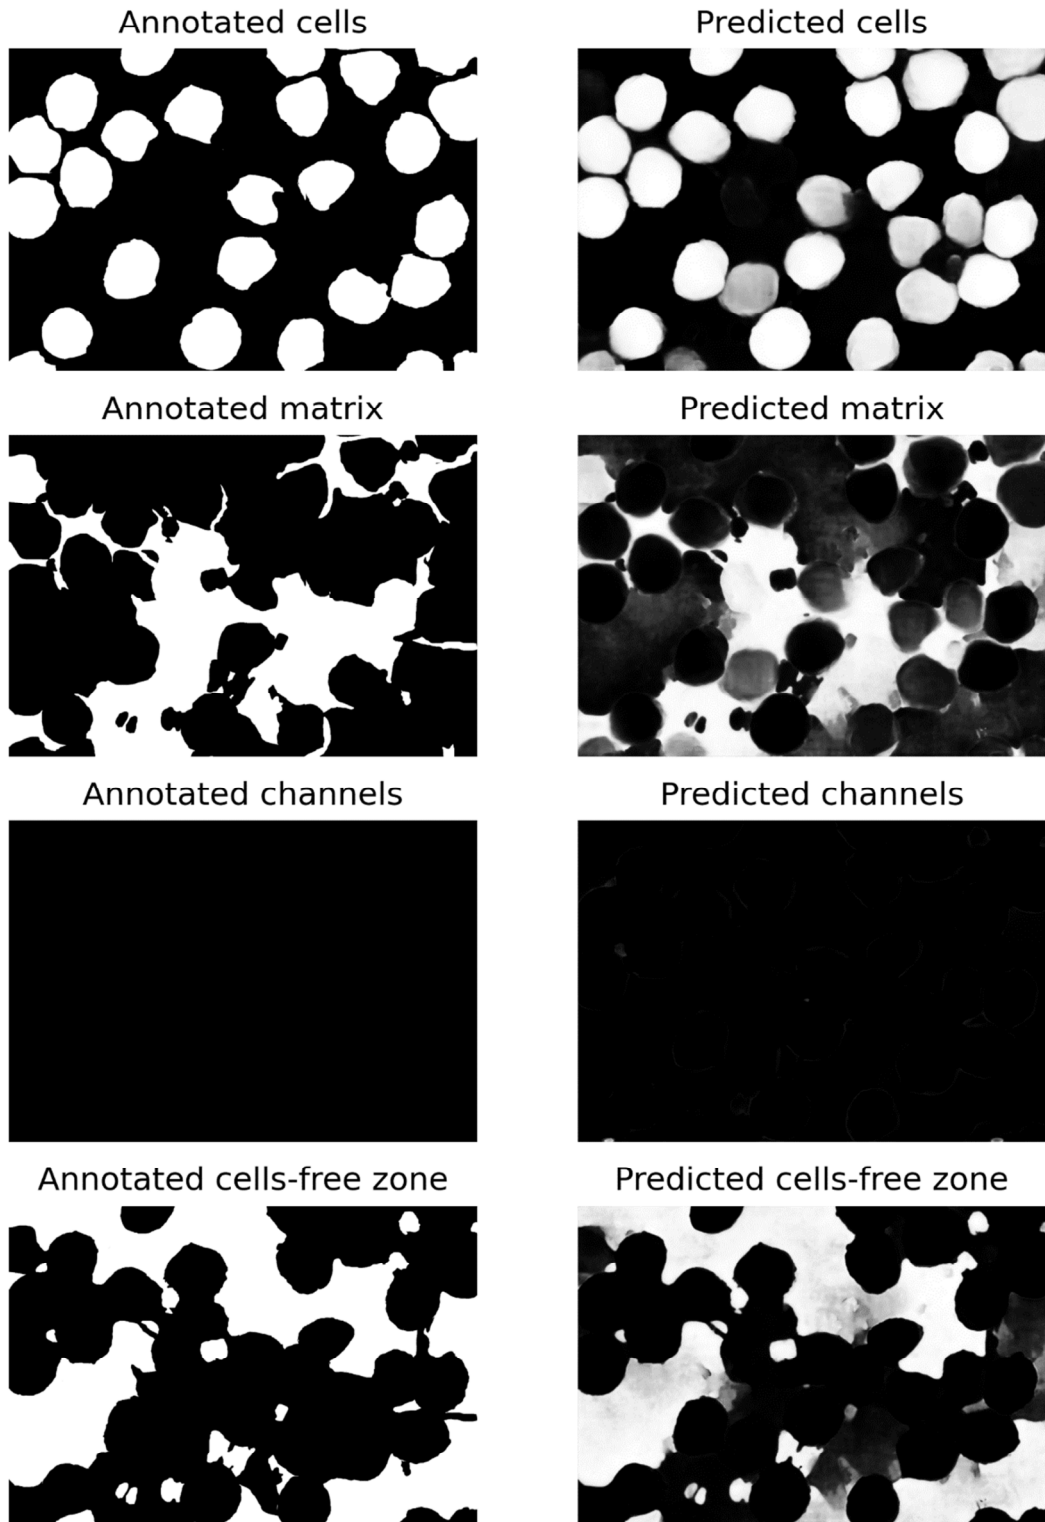

Figure 12. Model predictions on test image 2.

Total IoU score for image 3 is 78.79 %

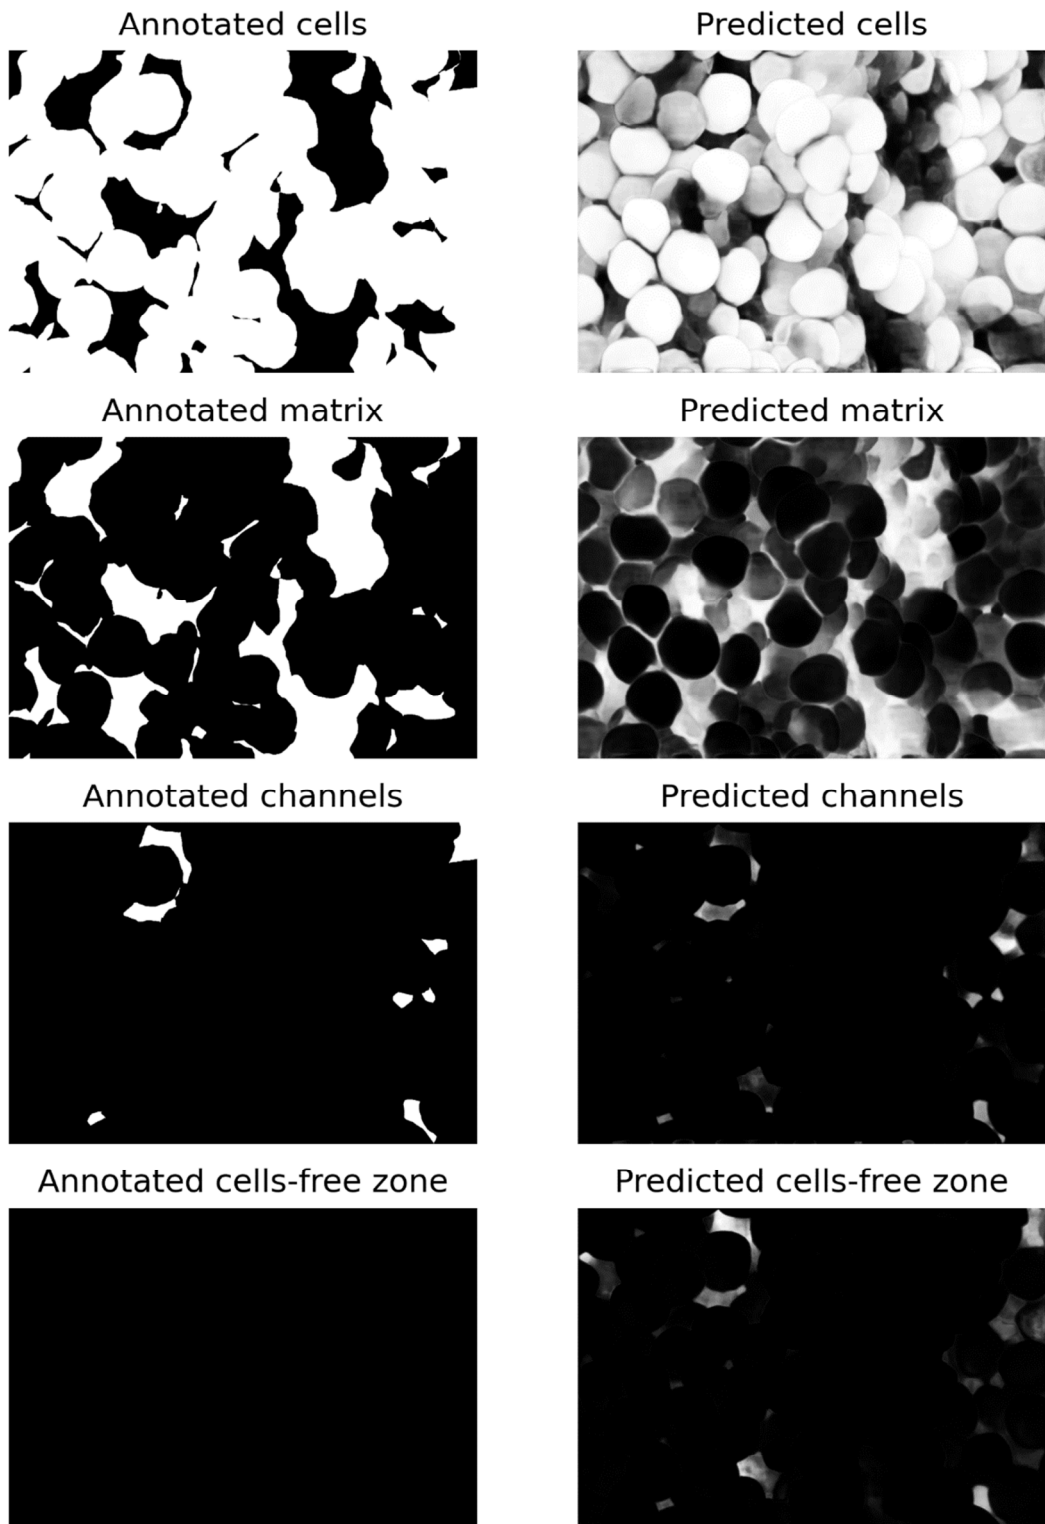

Figure 13. Model predictions on test image 3.

Total IoU score for image 4 is 81.51 %

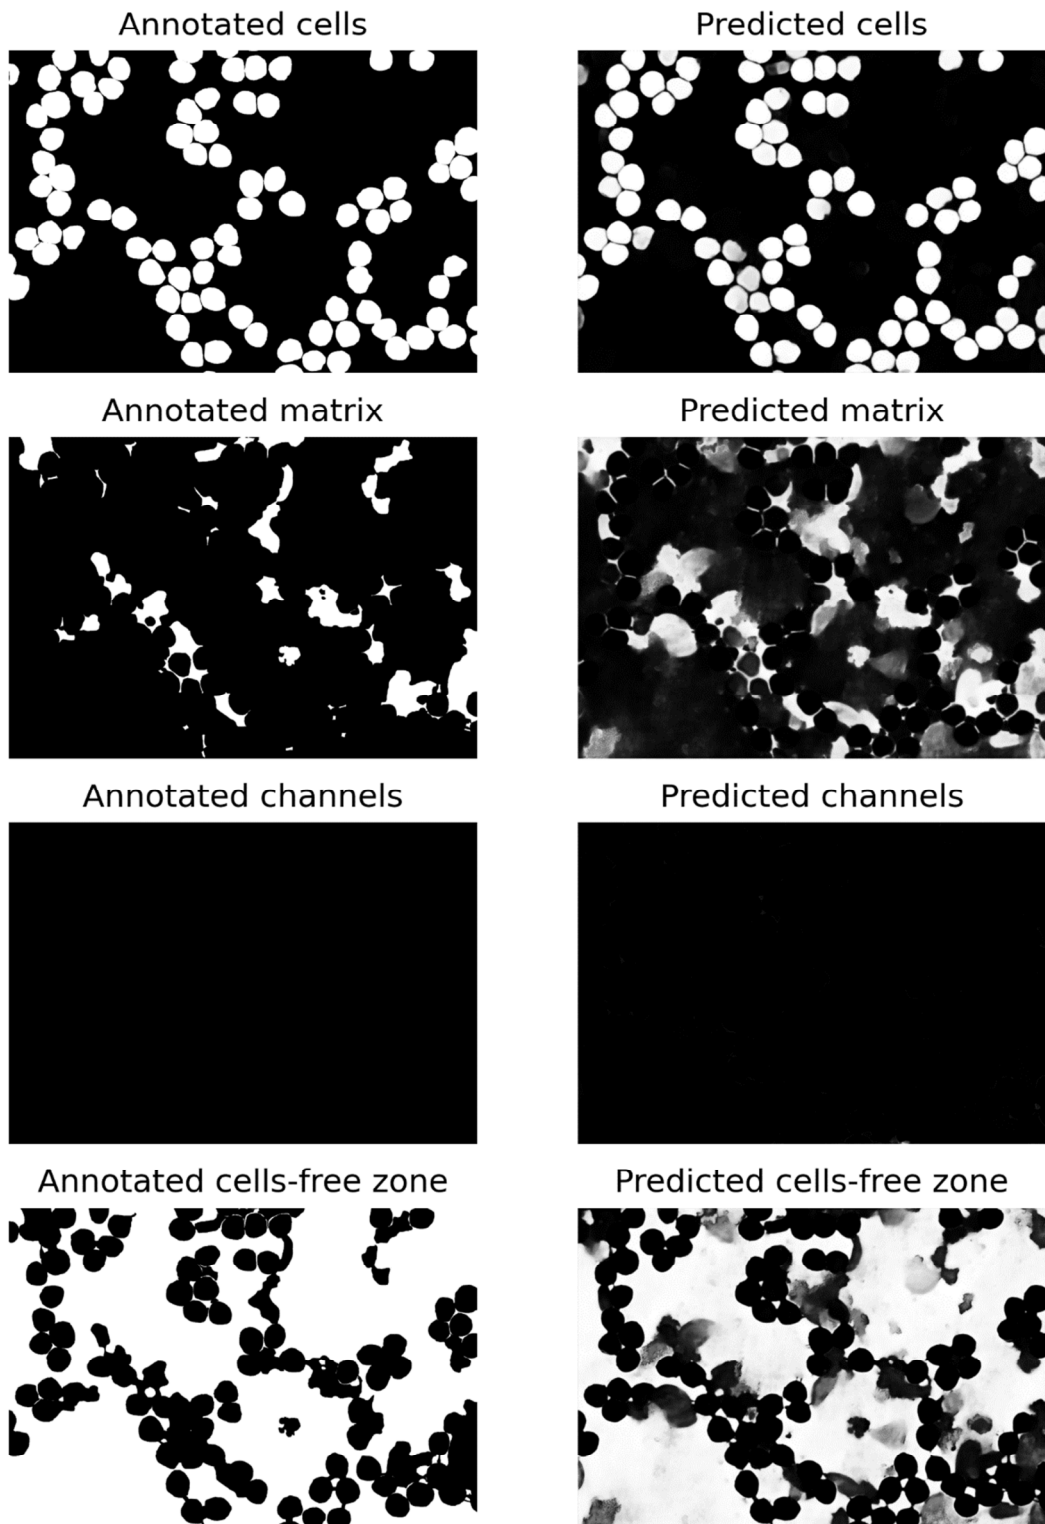

Figure 14. Model predictions on test image 3.



Total IoU score for image 5 is 65.43 %

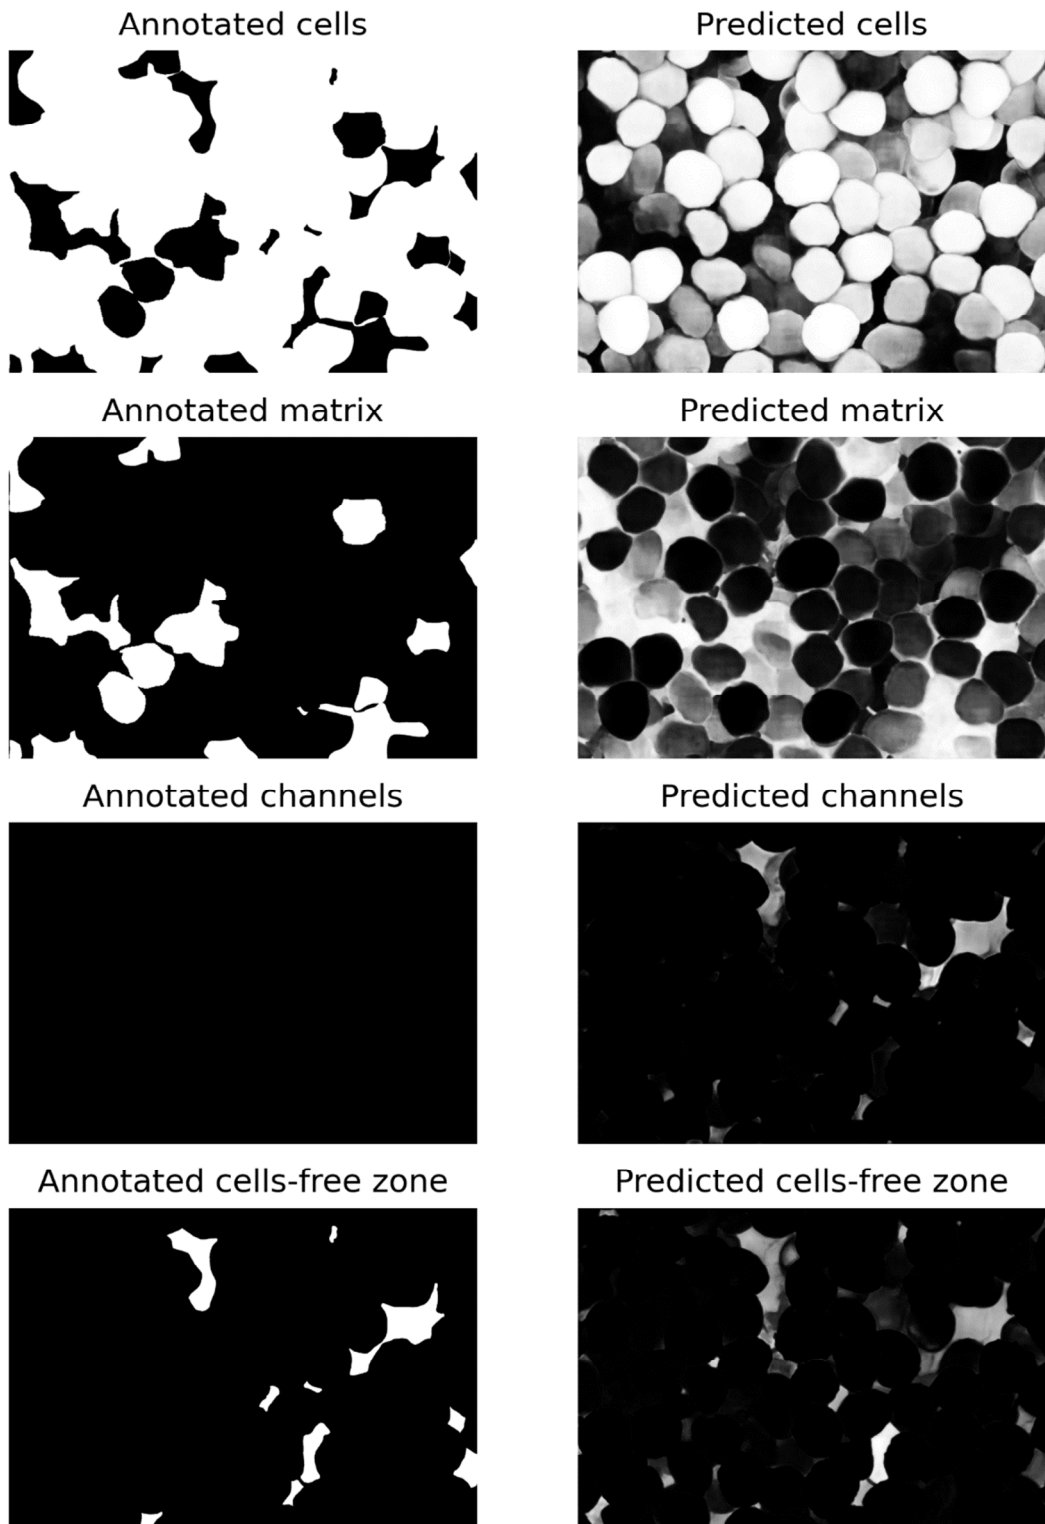

Figure 15. Model predictions on test image 5.

Total IoU score for image 6 is 71.17 %

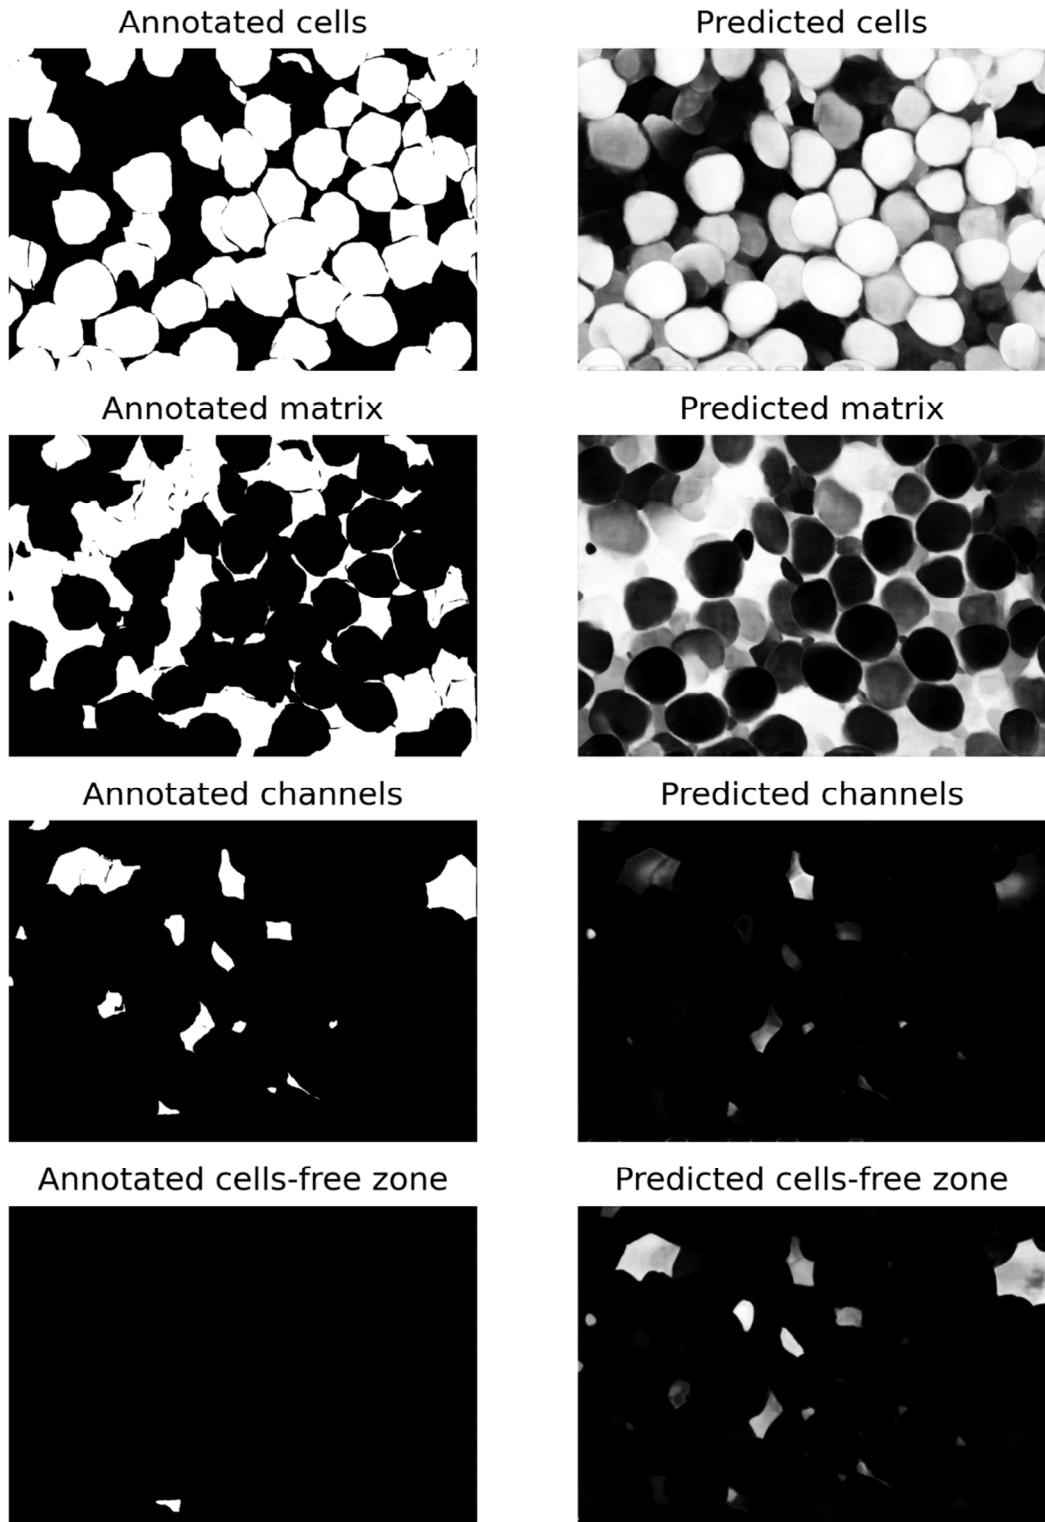

Figure 16. Model predictions on test image 6.

Total IoU score for image 7 is 78.84 %

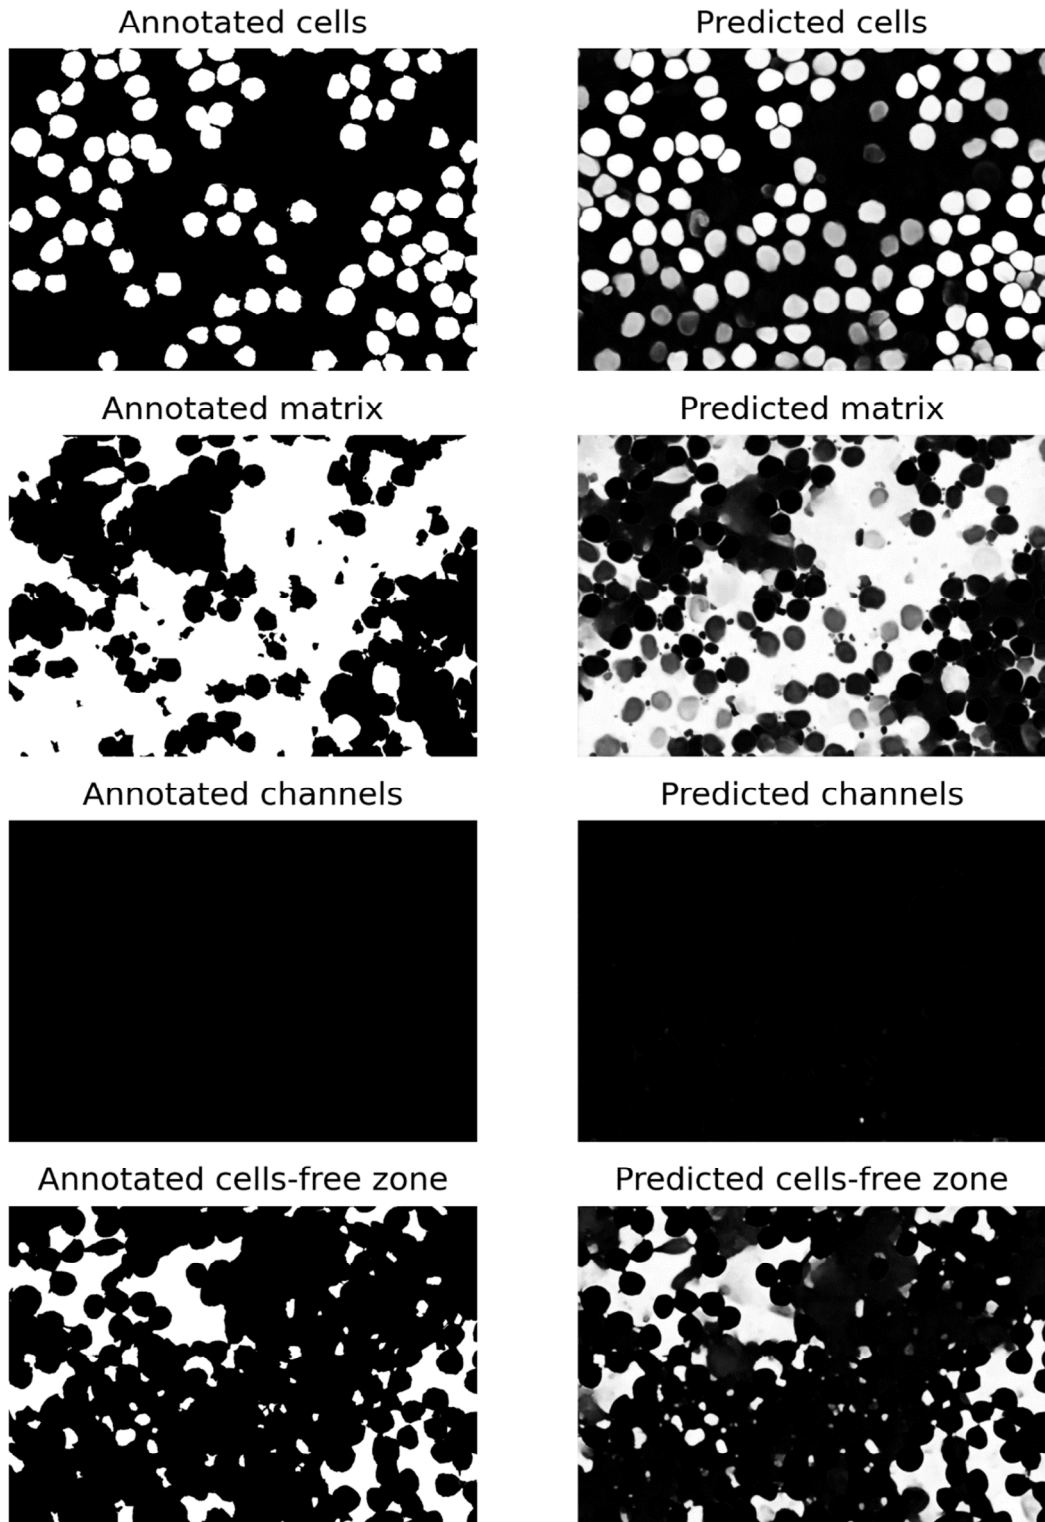

Figure 17. Model predictions on test image 7.

Total IoU score for image 8 is 92.17 %

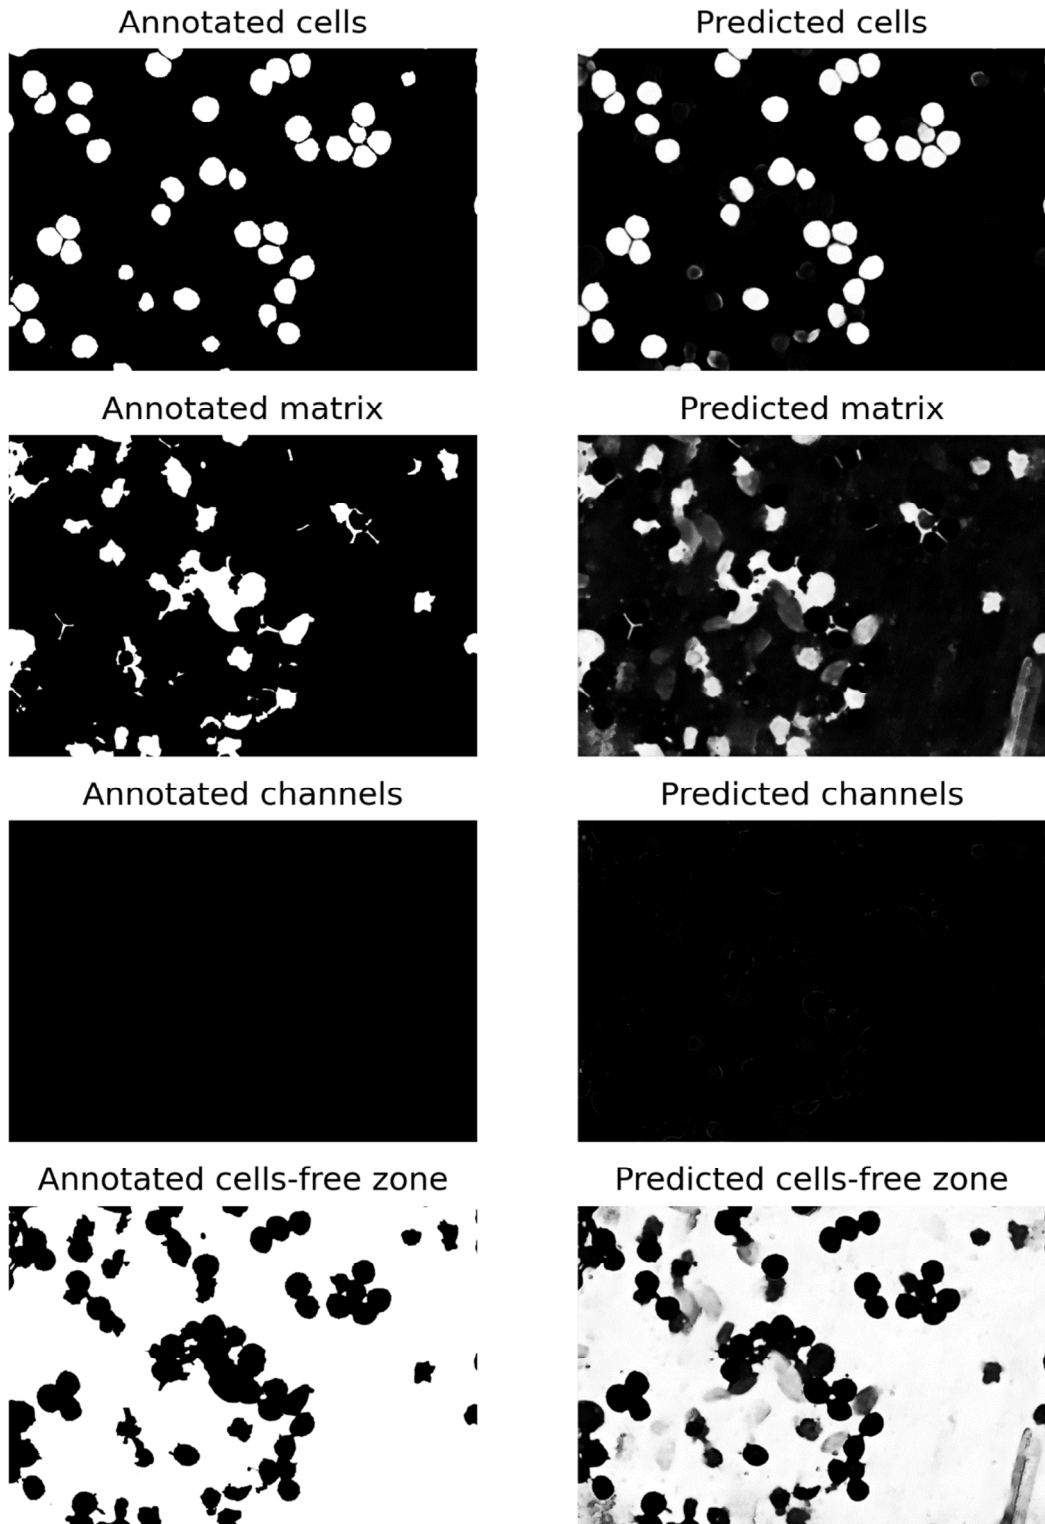

Figure 18. Model predictions on test image 8.

Total IoU score for image 9 is 72.99 %

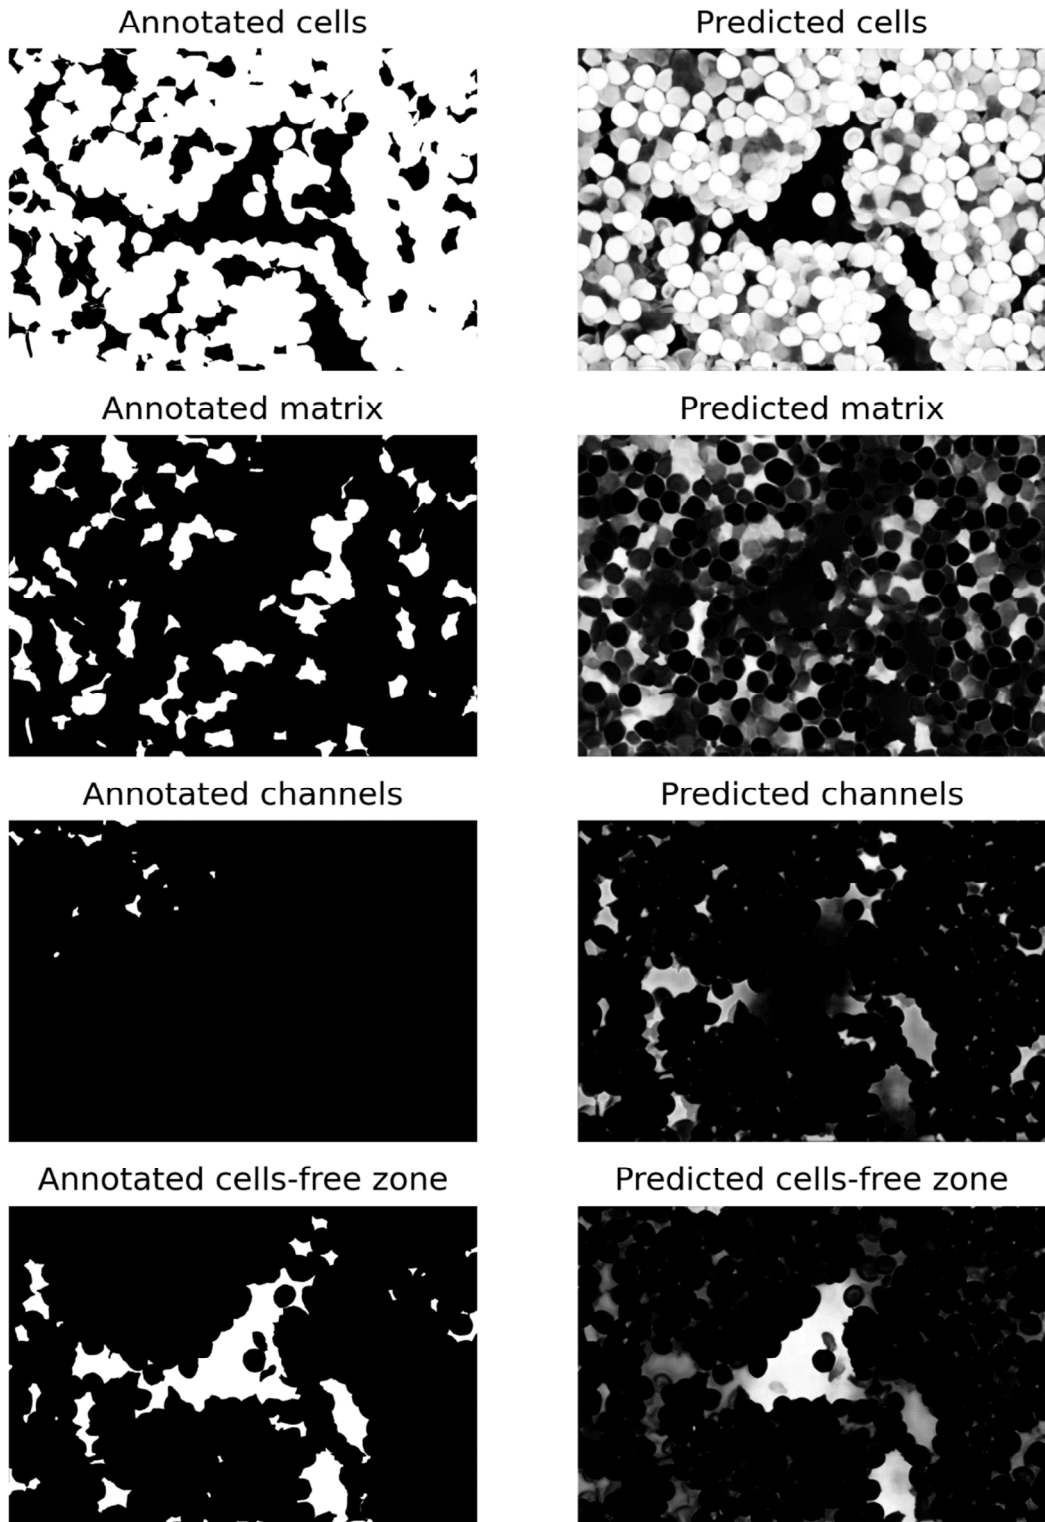

Figure 19. Model predictions on test image 9.

### 3.3 Neural network-based segmentation of cherry-picked examples

These segmentation maps refer to area analysis, which was discussed in the article in the “Object of study” section.

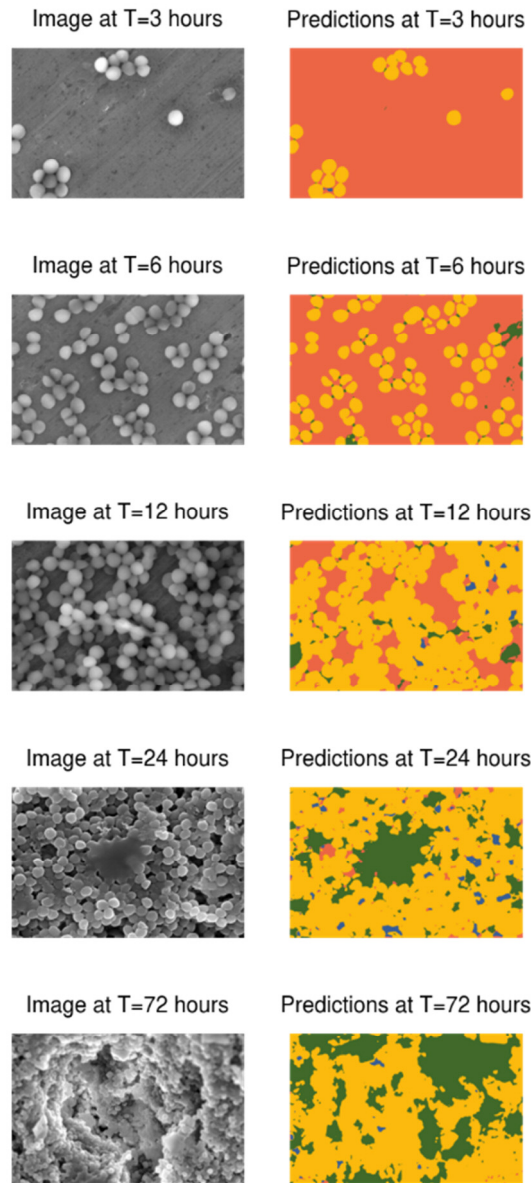

Figure 20. Neural network segmentation of cherry-picked images as an example of biofilm formation

### 3.4 Neural network-based predictions of a large number of SEM images for biofilm growth estimation

Here, we report statistics of segmentation class areas on each image, which were used for the calculation of biofilm formation rate constants.

Table 2. Area statistics for biofilm images after 1 hour.

| Image number | Cells | Matrix | Channels | Cells-free zone |
|--------------|-------|--------|----------|-----------------|
| 0            | 0.5%  | 0.7%   | 0%       | 98.8%           |
| 1            | 0.4%  | 0.4%   | 0%       | 99.2%           |

|    |       |       |    |       |
|----|-------|-------|----|-------|
| 2  | 0.6%  | 0.9%  | 0% | 98.4% |
| 3  | 0.4%  | 0.5%  | 0% | 99.0% |
| 4  | 0.6%  | 1.0%  | 0% | 98.4% |
| 5  | 0.4%  | 0.4%  | 0% | 99.3% |
| 6  | 0.3%  | 0.4%  | 0% | 99.3% |
| 7  | 0.7%  | 0.7%  | 0% | 98.6% |
| 8  | 0.7%  | 0.4%  | 0% | 98.9% |
| 9  | 0.7%  | 0.9%  | 0% | 98.5% |
| 10 | 1.1%  | 0.7%  | 0% | 98.1% |
| 11 | 0.7%  | 0.5%  | 0% | 98.8% |
| 12 | 0.3%  | 0.4%  | 0% | 99.3% |
| 13 | 0.3%  | 0.7%  | 0% | 99.0% |
| 14 | 0.7%  | 1.2%  | 0% | 98.2% |
| 15 | 0.4%  | 0.5%  | 0% | 99.1% |
| 16 | 0.3%  | 0.7%  | 0% | 98.9% |
| 17 | 0.4%  | 0.5%  | 0% | 99.1% |
| 18 | 0.4%  | 0.4%  | 0% | 99.3% |
| 19 | 1.1%  | 1.2%  | 0% | 97.7% |
| 20 | 1.1%  | 1.1%  | 0% | 97.9% |
| 21 | 1.1%  | 0.8%  | 0% | 98.1% |
| 22 | 1.0%  | 1.2%  | 0% | 97.8% |
| 23 | 0.5%  | 0.8%  | 0% | 98.7% |
| 24 | 0.4%  | 0.5%  | 0% | 99.1% |
| 25 | 0.3%  | 0.6%  | 0% | 99.0% |
| 26 | 0.3%  | 0.4%  | 0% | 99.3% |
| 27 | 0.4%  | 1.1%  | 0% | 98.5% |
| 28 | 0.3%  | 0.3%  | 0% | 99.4% |
| 29 | 0.5%  | 0.8%  | 0% | 98.7% |
| 30 | 9.3%  | 12.3% | 0% | 78.4% |
| 31 | 12.2% | 33.7% | 0% | 54.1% |
| 32 | 6.4%  | 18.8% | 0% | 74.8% |
| 33 | 0.2%  | 0.5%  | 0% | 99.3% |
| 34 | 0.4%  | 0.8%  | 0% | 98.8% |
| 35 | 0.2%  | 0.4%  | 0% | 99.3% |
| 36 | 0.3%  | 0.6%  | 0% | 99.0% |
| 37 | 0.4%  | 0.3%  | 0% | 99.3% |
| 38 | 0.3%  | 0.5%  | 0% | 99.2% |
| 39 | 0.4%  | 0.5%  | 0% | 99.2% |
| 40 | 13.6% | 42.6% | 0% | 43.8% |
| 41 | 7.7%  | 34.0% | 0% | 58.3% |
| 42 | 2.9%  | 19.1% | 0% | 78.0% |
| 43 | 0.5%  | 1.1%  | 0% | 98.4% |
| 44 | 0.8%  | 0.8%  | 0% | 98.4% |
| 45 | 0.3%  | 0.8%  | 0% | 98.9% |
| 46 | 0.3%  | 0.8%  | 0% | 98.9% |
| 47 | 0.3%  | 0.7%  | 0% | 99.0% |
| 48 | 0.3%  | 0.3%  | 0% | 99.4% |
| 49 | 0.6%  | 0.8%  | 0% | 98.6% |

|    |       |       |    |       |
|----|-------|-------|----|-------|
| 50 | 6.5%  | 1.3%  | 0% | 92.1% |
| 51 | 14.0% | 45.5% | 0% | 40.5% |
| 52 | 6.0%  | 19.9% | 0% | 74.1% |
| 53 | 0.4%  | 0.5%  | 0% | 99.0% |
| 54 | 1.2%  | 0.6%  | 0% | 98.2% |
| 55 | 0.9%  | 0.3%  | 0% | 98.8% |
| 56 | 0.9%  | 1.0%  | 0% | 98.2% |
| 57 | 0.5%  | 0.6%  | 0% | 98.9% |
| 58 | 0.3%  | 0.5%  | 0% | 99.3% |
| 59 | 0.8%  | 0.8%  | 0% | 98.4% |
| 60 | 5.3%  | 1.0%  | 0% | 93.7% |
| 61 | 5.5%  | 2.0%  | 0% | 92.4% |
| 62 | 5.2%  | 1.0%  | 0% | 93.8% |
| 63 | 0.6%  | 0.5%  | 0% | 98.9% |
| 64 | 0.3%  | 0.9%  | 0% | 98.8% |
| 65 | 0.3%  | 0.5%  | 0% | 99.3% |
| 66 | 0.5%  | 1.0%  | 0% | 98.5% |
| 67 | 0.3%  | 1.1%  | 0% | 98.6% |
| 68 | 0.4%  | 0.5%  | 0% | 99.1% |
| 69 | 0.5%  | 0.7%  | 0% | 98.8% |
| 70 | 0.9%  | 0.7%  | 0% | 98.3% |
| 71 | 3.0%  | 1.2%  | 0% | 95.8% |
| 72 | 3.5%  | 0.4%  | 0% | 96.1% |
| 73 | 0.5%  | 0.9%  | 0% | 98.7% |
| 74 | 0.3%  | 1.0%  | 0% | 98.7% |
| 75 | 0.4%  | 0.7%  | 0% | 98.9% |
| 76 | 0.5%  | 0.5%  | 0% | 99.0% |
| 77 | 0.3%  | 0.6%  | 0% | 99.1% |
| 78 | 0.5%  | 1.0%  | 0% | 98.5% |
| 79 | 0.4%  | 0.8%  | 0% | 98.9% |
| 80 | 2.4%  | 10.8% | 0% | 86.8% |
| 81 | 2.1%  | 1.0%  | 0% | 97.0% |
| 82 | 0.6%  | 1.3%  | 0% | 98.0% |
| 83 | 0.9%  | 0.6%  | 0% | 98.5% |
| 84 | 0.4%  | 0.9%  | 0% | 98.7% |
| 85 | 0.4%  | 0.7%  | 0% | 98.9% |
| 86 | 0.2%  | 0.8%  | 0% | 99.0% |
| 87 | 0.3%  | 0.3%  | 0% | 99.4% |
| 88 | 0.4%  | 0.8%  | 0% | 98.8% |
| 89 | 0.4%  | 1.1%  | 0% | 98.5% |
| 90 | 0.9%  | 0.6%  | 0% | 98.5% |
| 91 | 1.9%  | 2.2%  | 0% | 95.9% |
| 92 | 0.5%  | 0.4%  | 0% | 99.0% |
| 93 | 0.5%  | 0.9%  | 0% | 98.6% |
| 94 | 0.4%  | 1.1%  | 0% | 98.5% |
| 95 | 0.8%  | 1.1%  | 0% | 98.1% |
| 96 | 0.3%  | 1.1%  | 0% | 98.6% |
| 97 | 0.4%  | 0.9%  | 0% | 98.7% |



|    |      |      |    |       |
|----|------|------|----|-------|
| 98 | 0.5% | 0.5% | 0% | 99.0% |
| 99 | 0.5% | 0.6% | 0% | 98.9% |

Table 3. Area statistics for biofilm images after 3 hours.

| Image number | Cells | Matrix | Channels | Cells-free zone |
|--------------|-------|--------|----------|-----------------|
| 0            | 10.5% | 1.1%   | 0%       | 88.4%           |
| 1            | 13.3% | 0.7%   | 0%       | 86.1%           |
| 2            | 9.3%  | 0.4%   | 0%       | 90.4%           |
| 3            | 18.1% | 5.0%   | 0%       | 76.9%           |
| 4            | 6.2%  | 0.7%   | 0%       | 93.1%           |
| 5            | 3.3%  | 0.7%   | 0%       | 96.1%           |
| 6            | 0.8%  | 0.7%   | 0%       | 98.5%           |
| 7            | 0.4%  | 0.5%   | 0%       | 99.1%           |
| 8            | 1.0%  | 0.4%   | 0%       | 98.5%           |
| 9            | 1.0%  | 0.5%   | 0%       | 98.6%           |
| 10           | 13.2% | 2.1%   | 0%       | 84.6%           |
| 11           | 11.3% | 0.8%   | 0%       | 87.9%           |
| 12           | 26.3% | 5.9%   | 0%       | 67.8%           |
| 13           | 28.3% | 9.2%   | 0%       | 62.6%           |
| 14           | 8.6%  | 1.1%   | 0%       | 90.2%           |
| 15           | 6.4%  | 0.7%   | 0%       | 93.0%           |
| 16           | 2.5%  | 0.3%   | 0%       | 97.2%           |
| 17           | 1.2%  | 0.2%   | 0%       | 98.6%           |
| 18           | 1.4%  | 0.4%   | 0%       | 98.3%           |
| 19           | 1.2%  | 0.4%   | 0%       | 98.4%           |
| 20           | 3.4%  | 0.4%   | 0%       | 96.3%           |
| 21           | 10.9% | 1.1%   | 0%       | 88.0%           |
| 22           | 31.7% | 3.5%   | 0%       | 64.8%           |
| 23           | 35.3% | 6.2%   | 0%       | 58.5%           |
| 24           | 20.0% | 6.3%   | 0%       | 73.8%           |
| 25           | 21.7% | 12.0%  | 0%       | 66.3%           |
| 26           | 5.5%  | 0.7%   | 0%       | 93.8%           |
| 27           | 1.1%  | 0.2%   | 0%       | 98.6%           |
| 28           | 1.2%  | 0.3%   | 0%       | 98.5%           |
| 29           | 1.4%  | 0.7%   | 0%       | 97.9%           |
| 30           | 1.3%  | 0.3%   | 0%       | 98.4%           |
| 31           | 0.6%  | 0.5%   | 0%       | 98.9%           |
| 32           | 19.0% | 1.9%   | 0%       | 79.1%           |
| 33           | 38.0% | 7.1%   | 0%       | 54.9%           |
| 34           | 16.6% | 3.1%   | 0%       | 80.3%           |
| 35           | 14.0% | 1.7%   | 0%       | 84.3%           |
| 36           | 5.9%  | 0.5%   | 0%       | 93.6%           |
| 37           | 0.9%  | 0.5%   | 0%       | 98.6%           |
| 38           | 0.5%  | 0.4%   | 0%       | 99.1%           |
| 39           | 0.9%  | 0.5%   | 0%       | 98.6%           |
| 40           | 2.1%  | 0.3%   | 0%       | 97.6%           |

|    |       |      |    |       |
|----|-------|------|----|-------|
| 41 | 1.5%  | 0.7% | 0% | 97.8% |
| 42 | 2.0%  | 0.2% | 0% | 97.8% |
| 43 | 24.9% | 2.9% | 0% | 72.3% |
| 44 | 26.5% | 2.8% | 0% | 70.7% |
| 45 | 1.8%  | 0.4% | 0% | 97.8% |
| 46 | 0.5%  | 0.5% | 0% | 99.0% |
| 47 | 1.5%  | 0.4% | 0% | 98.2% |
| 48 | 5.3%  | 0.4% | 0% | 94.4% |
| 49 | 4.7%  | 0.4% | 0% | 94.9% |
| 50 | 2.8%  | 0.2% | 0% | 97.0% |
| 51 | 1.1%  | 0.4% | 0% | 98.5% |
| 52 | 3.1%  | 0.3% | 0% | 96.6% |
| 53 | 12.8% | 0.5% | 0% | 86.7% |
| 54 | 28.8% | 4.3% | 0% | 66.9% |
| 55 | 10.4% | 0.6% | 0% | 88.9% |
| 56 | 2.3%  | 0.3% | 0% | 97.4% |
| 57 | 2.7%  | 1.1% | 0% | 96.3% |
| 58 | 2.2%  | 0.5% | 0% | 97.3% |
| 59 | 3.6%  | 0.3% | 0% | 96.1% |
| 60 | 1.3%  | 0.4% | 0% | 98.3% |
| 61 | 0.5%  | 0.9% | 0% | 98.6% |
| 62 | 0.6%  | 0.6% | 0% | 98.8% |
| 63 | 0.5%  | 1.2% | 0% | 98.2% |
| 64 | 12.2% | 0.8% | 0% | 87.0% |
| 65 | 31.8% | 5.0% | 0% | 63.2% |
| 66 | 11.2% | 0.5% | 0% | 88.3% |
| 67 | 1.1%  | 0.2% | 0% | 98.7% |
| 68 | 1.4%  | 0.5% | 0% | 98.1% |
| 69 | 0.7%  | 0.4% | 0% | 98.9% |
| 70 | 1.4%  | 0.2% | 0% | 98.4% |
| 71 | 0.6%  | 0.2% | 0% | 99.2% |
| 72 | 3.2%  | 0.1% | 0% | 96.7% |
| 73 | 1.5%  | 0.3% | 0% | 98.2% |
| 74 | 0.7%  | 0.5% | 0% | 98.7% |
| 75 | 17.9% | 1.4% | 0% | 80.7% |
| 76 | 22.1% | 5.8% | 0% | 72.1% |
| 77 | 23.0% | 2.9% | 0% | 74.1% |
| 78 | 3.6%  | 0.4% | 0% | 96.0% |
| 79 | 7.5%  | 1.2% | 0% | 91.4% |
| 80 | 1.4%  | 0.4% | 0% | 98.3% |
| 81 | 3.4%  | 0.3% | 0% | 96.3% |
| 82 | 4.0%  | 0.4% | 0% | 95.6% |
| 83 | 1.0%  | 0.8% | 0% | 98.2% |
| 84 | 0.9%  | 0.5% | 0% | 98.6% |
| 85 | 16.5% | 2.5% | 0% | 80.9% |
| 86 | 33.6% | 5.7% | 0% | 60.7% |
| 87 | 21.3% | 7.1% | 0% | 71.6% |
| 88 | 5.0%  | 0.3% | 0% | 94.8% |

|    |       |       |    |       |
|----|-------|-------|----|-------|
| 89 | 2.8%  | 0.3%  | 0% | 96.9% |
| 90 | 1.1%  | 0.4%  | 0% | 98.5% |
| 91 | 0.6%  | 0.8%  | 0% | 98.6% |
| 92 | 0.4%  | 0.5%  | 0% | 99.1% |
| 93 | 2.1%  | 1.0%  | 0% | 96.9% |
| 94 | 3.1%  | 0.4%  | 0% | 96.5% |
| 95 | 11.3% | 1.4%  | 0% | 87.3% |
| 96 | 23.8% | 12.6% | 0% | 63.6% |
| 97 | 35.4% | 8.8%  | 0% | 55.9% |
| 98 | 11.9% | 1.0%  | 0% | 87.2% |
| 99 | 0.8%  | 0.4%  | 0% | 98.8% |

Table 4. Area statistics for biofilm images after 6 hours.

| Image number | Cells | Matrix | Channels | Cells-free zone |
|--------------|-------|--------|----------|-----------------|
| 0            | 1.8%  | 0.3%   | 0%       | 97.9%           |
| 1            | 0.9%  | 0.8%   | 0.0%     | 98.3%           |
| 2            | 0.9%  | 0.8%   | 0%       | 98.4%           |
| 3            | 0.8%  | 0.8%   | 0%       | 98.4%           |
| 4            | 10.9% | 0.7%   | 0%       | 88.3%           |
| 5            | 10.7% | 5.4%   | 0%       | 83.9%           |
| 6            | 13.0% | 2.2%   | 0%       | 84.8%           |
| 7            | 7.4%  | 1.4%   | 0%       | 91.2%           |
| 8            | 2.5%  | 0.5%   | 0%       | 97.0%           |
| 9            | 6.6%  | 0.3%   | 0%       | 93.1%           |
| 10           | 2.1%  | 0.5%   | 0%       | 97.4%           |
| 11           | 2.3%  | 0.4%   | 0%       | 97.3%           |
| 12           | 0.7%  | 0.7%   | 0%       | 98.7%           |
| 13           | 1.1%  | 0.4%   | 0%       | 98.5%           |
| 14           | 18.8% | 2.5%   | 0%       | 78.7%           |
| 15           | 19.1% | 15.2%  | 0%       | 65.7%           |
| 16           | 10.5% | 2.2%   | 0%       | 87.3%           |
| 17           | 14.0% | 1.8%   | 0%       | 84.2%           |
| 18           | 3.5%  | 0.6%   | 0%       | 95.9%           |
| 19           | 2.3%  | 0.8%   | 0%       | 96.9%           |
| 20           | 1.2%  | 0.1%   | 0%       | 98.7%           |
| 21           | 1.2%  | 0.1%   | 0%       | 98.7%           |
| 22           | 2.0%  | 0.7%   | 0%       | 97.3%           |
| 23           | 3.3%  | 0.4%   | 0%       | 96.2%           |
| 24           | 6.2%  | 0.7%   | 0%       | 93.2%           |
| 25           | 24.1% | 3.3%   | 0%       | 72.6%           |
| 26           | 3.7%  | 0.6%   | 0%       | 95.7%           |
| 27           | 1.5%  | 1.4%   | 0%       | 97.1%           |
| 28           | 14.9% | 3.6%   | 0%       | 81.5%           |
| 29           | 14.0% | 0.4%   | 0%       | 85.6%           |
| 30           | 3.3%  | 0.1%   | 0%       | 96.6%           |
| 31           | 14.0% | 0.8%   | 0%       | 85.2%           |

|    |      |      |    |       |
|----|------|------|----|-------|
| 32 | 0.6% | 0.6% | 0% | 98.7% |
| 33 | 2.3% | 0.3% | 0% | 97.3% |
| 34 | 2.5% | 0.3% | 0% | 97.2% |
| 35 | 1.9% | 0.3% | 0% | 97.8% |
| 36 | 2.1% | 0.3% | 0% | 97.6% |
| 37 | 2.5% | 0.4% | 0% | 97.0% |
| 38 | 0.7% | 0.4% | 0% | 98.9% |
| 39 | 6.9% | 0.4% | 0% | 92.7% |
| 40 | 1.8% | 0.2% | 0% | 98.0% |
| 41 | 6.0% | 0.3% | 0% | 93.7% |
| 42 | 1.0% | 0.5% | 0% | 98.5% |
| 43 | 0.5% | 1.0% | 0% | 98.5% |
| 44 | 0.8% | 1.0% | 0% | 98.1% |
| 45 | 0.5% | 0.5% | 0% | 99.0% |
| 46 | 3.6% | 2.1% | 0% | 94.3% |
| 47 | 5.2% | 1.5% | 0% | 93.2% |
| 48 | 1.8% | 0.5% | 0% | 97.7% |
| 49 | 1.6% | 0.5% | 0% | 97.9% |
| 50 | 0.8% | 0.5% | 0% | 98.8% |
| 51 | 1.2% | 0.4% | 0% | 98.5% |
| 52 | 1.9% | 0.5% | 0% | 97.6% |
| 53 | 0.8% | 1.2% | 0% | 98.0% |
| 54 | 3.1% | 0.3% | 0% | 96.6% |
| 55 | 4.9% | 0.6% | 0% | 94.5% |
| 56 | 0.6% | 0.4% | 0% | 99.0% |
| 57 | 2.2% | 0.6% | 0% | 97.2% |
| 58 | 2.5% | 0.4% | 0% | 97.2% |
| 59 | 1.5% | 0.3% | 0% | 98.2% |
| 60 | 1.7% | 0.3% | 0% | 98.0% |
| 61 | 3.3% | 0.4% | 0% | 96.4% |
| 62 | 1.6% | 0.6% | 0% | 97.9% |
| 63 | 1.0% | 1.2% | 0% | 97.8% |
| 64 | 0.9% | 0.4% | 0% | 98.7% |
| 65 | 7.7% | 0.2% | 0% | 92.1% |
| 66 | 6.5% | 0.2% | 0% | 93.2% |
| 67 | 3.4% | 0.6% | 0% | 96.0% |
| 68 | 2.9% | 0.7% | 0% | 96.4% |
| 69 | 4.4% | 0.5% | 0% | 95.1% |
| 70 | 0.7% | 0.6% | 0% | 98.6% |
| 71 | 0.9% | 0.7% | 0% | 98.4% |
| 72 | 1.3% | 0.3% | 0% | 98.4% |
| 73 | 4.0% | 0.5% | 0% | 95.5% |
| 74 | 4.8% | 0.4% | 0% | 94.8% |
| 75 | 4.2% | 0.6% | 0% | 95.2% |
| 76 | 3.5% | 0.3% | 0% | 96.2% |
| 77 | 5.0% | 0.2% | 0% | 94.8% |
| 78 | 3.4% | 0.3% | 0% | 96.3% |
| 79 | 2.6% | 2.0% | 0% | 95.4% |

|    |       |      |    |       |
|----|-------|------|----|-------|
| 80 | 0.8%  | 0.8% | 0% | 98.4% |
| 81 | 1.2%  | 0.5% | 0% | 98.3% |
| 82 | 0.7%  | 0.2% | 0% | 99.1% |
| 83 | 7.7%  | 0.6% | 0% | 91.8% |
| 84 | 6.6%  | 0.4% | 0% | 93.0% |
| 85 | 1.6%  | 0.3% | 0% | 98.0% |
| 86 | 6.9%  | 0.3% | 0% | 92.8% |
| 87 | 7.9%  | 0.3% | 0% | 91.8% |
| 88 | 7.2%  | 0.3% | 0% | 92.5% |
| 89 | 1.2%  | 0.6% | 0% | 98.2% |
| 90 | 1.0%  | 1.5% | 0% | 97.5% |
| 91 | 0.7%  | 1.4% | 0% | 97.9% |
| 92 | 2.4%  | 0.2% | 0% | 97.4% |
| 93 | 18.8% | 3.2% | 0% | 78.0% |
| 94 | 2.6%  | 0.4% | 0% | 97.0% |
| 95 | 3.9%  | 0.5% | 0% | 95.6% |
| 96 | 22.1% | 3.0% | 0% | 75.0% |
| 97 | 22.9% | 2.3% | 0% | 74.8% |
| 98 | 23.2% | 3.1% | 0% | 73.7% |
| 99 | 11.7% | 0.6% | 0% | 87.8% |

Table 5. Area statistics for biofilm images after 9 hours.

| Image number | Cells | Matrix | Channels | Cells-free zone |
|--------------|-------|--------|----------|-----------------|
| 0            | 2.3%  | 0.3%   | 0%       | 97.4%           |
| 1            | 33.1% | 7.4%   | 0%       | 59.5%           |
| 2            | 39.3% | 11.6%  | 0%       | 49.1%           |
| 3            | 40.6% | 12.1%  | 0%       | 47.3%           |
| 4            | 57.3% | 17.6%  | 0.1%     | 25.0%           |
| 5            | 59.4% | 28.7%  | 0%       | 11.8%           |
| 6            | 56.4% | 30.8%  | 0%       | 12.8%           |
| 7            | 49.8% | 11.9%  | 0.1%     | 38.2%           |
| 8            | 35.6% | 3.5%   | 0%       | 60.9%           |
| 9            | 41.1% | 5.7%   | 0%       | 53.2%           |
| 10           | 14.2% | 0.7%   | 0%       | 85.1%           |
| 11           | 36.6% | 3.7%   | 0%       | 59.7%           |
| 12           | 39.5% | 8.1%   | 0%       | 52.5%           |
| 13           | 41.0% | 7.8%   | 0%       | 51.3%           |
| 14           | 54.5% | 19.4%  | 0.1%     | 26.0%           |
| 15           | 58.6% | 28.6%  | 0.1%     | 12.7%           |
| 16           | 56.3% | 26.2%  | 0%       | 17.5%           |
| 17           | 34.1% | 3.9%   | 0%       | 62.0%           |
| 18           | 10.2% | 0.3%   | 0%       | 89.5%           |
| 19           | 35.6% | 3.9%   | 0%       | 60.5%           |
| 20           | 35.5% | 3.4%   | 0%       | 61.0%           |
| 21           | 45.4% | 5.9%   | 0%       | 48.7%           |
| 22           | 36.3% | 4.0%   | 0%       | 59.8%           |

|    |       |       |      |       |
|----|-------|-------|------|-------|
| 23 | 40.5% | 5.5%  | 0%   | 54.0% |
| 24 | 57.1% | 24.1% | 0.1% | 18.7% |
| 25 | 57.5% | 31.3% | 0.4% | 10.8% |
| 26 | 47.3% | 10.7% | 0%   | 42.0% |
| 27 | 3.5%  | 0.3%  | 0%   | 96.2% |
| 28 | 0.7%  | 0.9%  | 0%   | 98.4% |
| 29 | 13.8% | 0.5%  | 0%   | 85.7% |
| 30 | 36.6% | 8.1%  | 0%   | 55.3% |
| 31 | 40.4% | 5.7%  | 0%   | 54.0% |
| 32 | 35.1% | 3.5%  | 0%   | 61.4% |
| 33 | 46.7% | 9.3%  | 0%   | 44.0% |
| 34 | 60.6% | 28.1% | 0%   | 11.3% |
| 35 | 57.9% | 32.0% | 0%   | 10.1% |
| 36 | 39.2% | 4.7%  | 0%   | 56.1% |
| 37 | 13.5% | 0.9%  | 0%   | 85.6% |
| 38 | 10.1% | 0.5%  | 0%   | 89.3% |
| 39 | 1.2%  | 0.4%  | 0%   | 98.5% |
| 40 | 39.6% | 8.7%  | 0%   | 51.6% |
| 41 | 36.3% | 5.7%  | 0%   | 58.0% |
| 42 | 40.2% | 6.2%  | 0%   | 53.5% |
| 43 | 51.7% | 15.0% | 0.3% | 32.9% |
| 44 | 59.9% | 28.1% | 0.2% | 11.9% |
| 45 | 56.3% | 26.4% | 0%   | 17.3% |
| 46 | 32.0% | 4.0%  | 0%   | 64.0% |
| 47 | 38.3% | 10.7% | 0%   | 51.0% |
| 48 | 20.9% | 1.4%  | 0%   | 77.7% |
| 49 | 15.7% | 0.6%  | 0%   | 83.7% |
| 50 | 45.2% | 6.5%  | 0%   | 48.3% |
| 51 | 41.2% | 7.8%  | 0%   | 51.0% |
| 52 | 38.4% | 10.0% | 0%   | 51.6% |
| 53 | 56.2% | 16.3% | 0.3% | 27.1% |
| 54 | 60.6% | 29.6% | 0.1% | 9.8%  |
| 55 | 56.8% | 17.6% | 0.1% | 25.5% |
| 56 | 44.7% | 7.8%  | 0%   | 47.5% |
| 57 | 38.3% | 10.7% | 0%   | 51.0% |
| 58 | 41.5% | 13.9% | 0%   | 44.6% |
| 59 | 44.3% | 7.0%  | 0%   | 48.7% |
| 60 | 39.6% | 18.2% | 0%   | 42.2% |
| 61 | 28.1% | 2.1%  | 0%   | 69.9% |
| 62 | 1.0%  | 1.2%  | 0%   | 97.7% |
| 63 | 52.4% | 18.2% | 0.5% | 28.9% |
| 64 | 55.7% | 31.6% | 0%   | 12.7% |
| 65 | 46.5% | 7.7%  | 0.1% | 45.8% |
| 66 | 37.9% | 3.9%  | 0%   | 58.2% |
| 67 | 44.0% | 6.2%  | 0%   | 49.8% |
| 68 | 41.4% | 7.6%  | 0%   | 51.0% |
| 69 | 40.2% | 5.5%  | 0%   | 54.3% |
| 70 | 1.7%  | 0.8%  | 0%   | 97.5% |

|    |       |       |      |       |
|----|-------|-------|------|-------|
| 71 | 2.4%  | 0.6%  | 0%   | 97.0% |
| 72 | 0.5%  | 0.7%  | 0%   | 98.8% |
| 73 | 42.9% | 6.8%  | 0%   | 50.3% |
| 74 | 60.4% | 26.3% | 0.1% | 13.3% |
| 75 | 30.0% | 2.3%  | 0%   | 67.7% |
| 76 | 6.4%  | 0.3%  | 0%   | 93.3% |
| 77 | 36.3% | 3.7%  | 0%   | 60.1% |
| 78 | 44.8% | 11.6% | 0%   | 43.6% |
| 79 | 42.3% | 5.9%  | 0%   | 51.7% |
| 80 | 0.7%  | 0.9%  | 0%   | 98.4% |
| 81 | 0.3%  | 1.0%  | 0%   | 98.7% |
| 82 | 5.7%  | 0.3%  | 0%   | 94.0% |
| 83 | 33.7% | 10.8% | 0%   | 55.5% |
| 84 | 56.3% | 16.6% | 0.2% | 26.9% |
| 85 | 40.5% | 6.2%  | 0.4% | 52.8% |
| 86 | 0.8%  | 0.7%  | 0%   | 98.4% |
| 87 | 2.1%  | 0.3%  | 0%   | 97.6% |
| 88 | 37.3% | 4.7%  | 0%   | 58.0% |
| 89 | 51.5% | 14.9% | 0%   | 33.6% |
| 90 | 13.0% | 0.6%  | 0%   | 86.4% |
| 91 | 0.5%  | 0.3%  | 0%   | 99.2% |
| 92 | 23.6% | 2.2%  | 0%   | 74.2% |
| 93 | 4.8%  | 0.3%  | 0%   | 94.9% |
| 94 | 5.8%  | 0.3%  | 0%   | 93.9% |
| 95 | 53.2% | 10.5% | 0.5% | 35.8% |
| 96 | 17.1% | 1.3%  | 0%   | 81.5% |
| 97 | 8.9%  | 0.5%  | 0%   | 90.6% |
| 98 | 50.7% | 12.3% | 0%   | 37.0% |
| 99 | 57.8% | 29.0% | 0.1% | 13.1% |

Table 6. Area statistics for biofilm images after 24 hours.

| Image number | Cells | Matrix | Channels | Cells-free zone |
|--------------|-------|--------|----------|-----------------|
| 0            | 6.4%  | 0.4%   | 0%       | 93.2%           |
| 1            | 56.9% | 25.3%  | 0.2%     | 17.6%           |
| 2            | 59.6% | 29.2%  | 0.3%     | 10.9%           |
| 3            | 1.2%  | 0.3%   | 0%       | 98.5%           |
| 4            | 33.8% | 2.2%   | 0%       | 64.0%           |
| 5            | 49.6% | 10.3%  | 0%       | 40.1%           |
| 6            | 54.0% | 17.0%  | 0.3%     | 28.8%           |
| 7            | 39.0% | 4.3%   | 0%       | 56.7%           |
| 8            | 50.6% | 10.8%  | 0%       | 38.6%           |
| 9            | 53.0% | 19.5%  | 0%       | 27.5%           |
| 10           | 45.1% | 7.1%   | 0.1%     | 47.7%           |
| 11           | 55.0% | 17.4%  | 0%       | 27.6%           |
| 12           | 38.2% | 8.5%   | 0%       | 53.3%           |
| 13           | 50.6% | 11.8%  | 0%       | 37.5%           |

|    |       |       |      |       |
|----|-------|-------|------|-------|
| 14 | 49.1% | 11.9% | 0%   | 39.0% |
| 15 | 46.5% | 9.5%  | 0%   | 44.0% |
| 16 | 52.1% | 14.0% | 0%   | 34.0% |
| 17 | 53.3% | 16.6% | 0.2% | 29.9% |
| 18 | 51.4% | 11.8% | 0%   | 36.9% |
| 19 | 49.0% | 10.1% | 0%   | 40.9% |
| 20 | 11.1% | 0.3%  | 0%   | 88.6% |
| 21 | 7.0%  | 0.4%  | 0%   | 92.6% |
| 22 | 13.1% | 0.4%  | 0%   | 86.5% |
| 23 | 47.3% | 9.0%  | 0%   | 43.7% |
| 24 | 49.8% | 10.3% | 0%   | 40.0% |
| 25 | 54.6% | 17.1% | 0.2% | 28.1% |
| 26 | 50.0% | 14.4% | 0%   | 35.6% |
| 27 | 50.4% | 9.7%  | 0%   | 39.9% |
| 28 | 47.0% | 11.3% | 0%   | 41.6% |
| 29 | 36.0% | 3.5%  | 0%   | 60.5% |
| 30 | 11.6% | 0.1%  | 0%   | 88.2% |
| 31 | 0.4%  | 1.0%  | 0%   | 98.6% |
| 32 | 50.1% | 9.4%  | 0.1% | 40.5% |
| 33 | 4.0%  | 0.2%  | 0%   | 95.9% |
| 34 | 48.0% | 9.7%  | 0%   | 42.3% |
| 35 | 48.8% | 9.6%  | 0%   | 41.6% |
| 36 | 48.0% | 13.5% | 0%   | 38.5% |
| 37 | 49.9% | 10.2% | 0%   | 39.9% |
| 38 | 53.9% | 16.4% | 0%   | 29.7% |
| 39 | 2.7%  | 0.6%  | 0%   | 96.7% |
| 40 | 1.0%  | 0.6%  | 0%   | 98.5% |
| 41 | 8.6%  | 0.3%  | 0%   | 91.2% |
| 42 | 25.6% | 2.1%  | 0%   | 72.3% |
| 43 | 20.8% | 0.9%  | 0%   | 78.3% |
| 44 | 50.6% | 11.8% | 0%   | 37.5% |
| 45 | 50.2% | 14.0% | 0%   | 35.7% |
| 46 | 47.9% | 10.4% | 0%   | 41.7% |
| 47 | 49.3% | 12.3% | 0%   | 38.4% |
| 48 | 31.8% | 6.0%  | 0%   | 62.2% |
| 49 | 1.0%  | 0.7%  | 0%   | 98.3% |
| 50 | 0.5%  | 0.8%  | 0%   | 98.7% |
| 51 | 24.7% | 1.3%  | 0%   | 74.1% |
| 52 | 23.7% | 2.2%  | 0%   | 74.2% |
| 53 | 45.8% | 7.8%  | 0%   | 46.4% |
| 54 | 49.8% | 9.9%  | 0%   | 40.4% |
| 55 | 52.1% | 14.0% | 0%   | 33.9% |
| 56 | 49.2% | 11.5% | 0%   | 39.3% |
| 57 | 56.7% | 20.0% | 0%   | 23.3% |
| 58 | 47.6% | 7.0%  | 0.2% | 45.2% |
| 59 | 2.9%  | 0.2%  | 0%   | 96.9% |
| 60 | 0.6%  | 1.4%  | 0%   | 98.1% |
| 61 | 1.2%  | 0.9%  | 0%   | 97.9% |



|    |       |       |      |       |
|----|-------|-------|------|-------|
| 62 | 2.2%  | 0.4%  | 0%   | 97.4% |
| 63 | 49.9% | 10.2% | 0.1% | 39.8% |
| 64 | 49.5% | 10.4% | 0%   | 40.1% |
| 65 | 50.1% | 12.9% | 0%   | 36.9% |
| 66 | 48.1% | 9.6%  | 0%   | 42.3% |
| 67 | 58.6% | 26.0% | 0%   | 15.4% |
| 68 | 55.9% | 23.0% | 0.1% | 21.0% |
| 69 | 1.8%  | 0.3%  | 0%   | 97.8% |
| 70 | 1.9%  | 0.4%  | 0%   | 97.7% |
| 71 | 54.4% | 16.1% | 0%   | 29.5% |
| 72 | 48.9% | 11.0% | 0.1% | 40.0% |
| 73 | 47.2% | 12.3% | 0%   | 40.4% |
| 74 | 52.6% | 15.3% | 0%   | 32.1% |
| 75 | 49.0% | 8.2%  | 0%   | 42.7% |
| 76 | 47.8% | 9.1%  | 0%   | 43.2% |
| 77 | 59.7% | 23.3% | 0.1% | 16.9% |
| 78 | 62.2% | 28.6% | 0%   | 9.2%  |
| 79 | 0.6%  | 0.9%  | 0%   | 98.5% |
| 80 | 36.2% | 17.2% | 0%   | 46.7% |
| 81 | 16.0% | 2.4%  | 0%   | 81.6% |
| 82 | 48.9% | 9.3%  | 0%   | 41.9% |
| 83 | 54.5% | 16.2% | 0%   | 29.4% |
| 84 | 48.3% | 9.6%  | 0%   | 42.0% |
| 85 | 50.6% | 11.0% | 0%   | 38.4% |
| 86 | 49.9% | 11.3% | 0%   | 38.8% |
| 87 | 59.7% | 27.9% | 0.1% | 12.3% |
| 88 | 57.5% | 15.3% | 0%   | 27.1% |
| 89 | 0.7%  | 1.6%  | 0%   | 97.7% |
| 90 | 30.2% | 4.3%  | 0%   | 65.4% |
| 91 | 1.0%  | 1.2%  | 0%   | 97.9% |
| 92 | 47.9% | 8.1%  | 0%   | 44.0% |
| 93 | 50.0% | 11.2% | 0%   | 38.9% |
| 94 | 47.2% | 9.6%  | 0%   | 43.2% |
| 95 | 50.6% | 9.3%  | 0%   | 40.1% |
| 96 | 49.0% | 10.9% | 0%   | 40.0% |
| 97 | 47.7% | 8.5%  | 0%   | 43.8% |
| 98 | 59.2% | 24.9% | 0%   | 16.0% |
| 99 | 49.3% | 11.1% | 0%   | 39.5% |

Table 7. Area statistics for biofilm images after 48 hours.

| Image number | Cells | Matrix | Channels | Cells-free zone |
|--------------|-------|--------|----------|-----------------|
| 0            | 42.1% | 21.4%  | 0%       | 36.5%           |
| 1            | 53.8% | 30.3%  | 0%       | 15.9%           |
| 2            | 57.3% | 24.1%  | 0%       | 18.6%           |
| 3            | 59.4% | 31.1%  | 0.1%     | 9.5%            |
| 4            | 51.8% | 29.3%  | 0%       | 18.8%           |

|    |       |       |      |       |
|----|-------|-------|------|-------|
| 5  | 56.6% | 26.5% | 0%   | 17.0% |
| 6  | 43.4% | 11.8% | 0%   | 44.8% |
| 7  | 58.1% | 33.6% | 0%   | 8.2%  |
| 8  | 55.7% | 34.8% | 0%   | 9.5%  |
| 9  | 55.7% | 27.6% | 0%   | 16.7% |
| 10 | 47.4% | 26.5% | 0%   | 26.1% |
| 11 | 55.5% | 29.2% | 0%   | 15.3% |
| 12 | 55.6% | 27.1% | 0%   | 17.3% |
| 13 | 50.9% | 26.1% | 0%   | 22.9% |
| 14 | 58.3% | 34.4% | 0.4% | 6.8%  |
| 15 | 62.1% | 28.0% | 0.2% | 9.8%  |
| 16 | 56.2% | 33.4% | 0%   | 10.4% |
| 17 | 54.4% | 25.1% | 0%   | 20.5% |
| 18 | 50.4% | 25.0% | 0%   | 24.6% |
| 19 | 55.9% | 26.0% | 0.4% | 17.8% |
| 20 | 55.2% | 31.3% | 0%   | 13.4% |
| 21 | 56.2% | 31.3% | 0%   | 12.5% |
| 22 | 56.4% | 29.8% | 0%   | 13.8% |
| 23 | 50.3% | 18.7% | 0%   | 30.9% |
| 24 | 53.2% | 35.4% | 0%   | 11.4% |
| 25 | 56.1% | 31.1% | 0%   | 12.7% |
| 26 | 54.3% | 37.1% | 0.1% | 8.4%  |
| 27 | 46.2% | 13.0% | 0%   | 40.8% |
| 28 | 56.8% | 28.5% | 0%   | 14.7% |
| 29 | 56.4% | 31.1% | 0.1% | 12.4% |
| 30 | 55.0% | 29.2% | 0%   | 15.8% |
| 31 | 56.7% | 31.4% | 0.2% | 11.7% |
| 32 | 57.8% | 27.0% | 0%   | 15.2% |
| 33 | 55.8% | 25.8% | 0%   | 18.4% |
| 34 | 45.2% | 19.6% | 0%   | 35.2% |
| 35 | 56.5% | 33.6% | 0.2% | 9.8%  |
| 36 | 59.1% | 33.0% | 0.1% | 7.8%  |
| 37 | 56.8% | 33.8% | 0.2% | 9.1%  |
| 38 | 56.1% | 31.3% | 0%   | 12.6% |
| 39 | 52.8% | 28.5% | 0%   | 18.6% |
| 40 | 56.6% | 30.3% | 0%   | 13.1% |
| 41 | 55.9% | 32.5% | 0%   | 11.5% |
| 42 | 57.3% | 26.0% | 0%   | 16.7% |
| 43 | 52.7% | 19.7% | 0%   | 27.6% |
| 44 | 52.7% | 27.7% | 0%   | 19.6% |
| 45 | 6.9%  | 0.2%  | 0%   | 92.8% |
| 46 | 14.1% | 2.0%  | 0%   | 83.9% |
| 47 | 57.4% | 32.2% | 0%   | 10.4% |
| 48 | 57.7% | 24.4% | 0%   | 17.9% |
| 49 | 52.0% | 23.0% | 0%   | 24.9% |
| 50 | 59.3% | 30.2% | 0.1% | 10.5% |
| 51 | 57.7% | 31.0% | 0.2% | 11.1% |
| 52 | 50.4% | 20.1% | 0.1% | 29.4% |

|    |       |       |      |       |
|----|-------|-------|------|-------|
| 53 | 49.9% | 13.0% | 0%   | 37.1% |
| 54 | 48.3% | 23.5% | 0%   | 28.2% |
| 55 | 56.4% | 36.3% | 0.2% | 7.2%  |
| 56 | 53.5% | 35.8% | 0%   | 10.7% |
| 57 | 56.4% | 27.6% | 0%   | 16.0% |
| 58 | 56.7% | 31.5% | 0.2% | 11.7% |
| 59 | 56.6% | 29.9% | 0%   | 13.5% |
| 60 | 59.6% | 28.5% | 0%   | 11.9% |
| 61 | 59.0% | 29.5% | 0%   | 11.5% |
| 62 | 52.8% | 15.6% | 0%   | 31.5% |
| 63 | 50.9% | 14.5% | 0%   | 34.5% |
| 64 | 52.8% | 19.7% | 0%   | 27.5% |
| 65 | 60.0% | 28.6% | 0.4% | 11.1% |
| 66 | 48.1% | 17.3% | 0%   | 34.6% |
| 67 | 52.9% | 31.1% | 0%   | 16.1% |
| 68 | 60.2% | 29.7% | 0%   | 10.1% |
| 69 | 54.5% | 25.3% | 0%   | 20.2% |
| 70 | 55.7% | 30.7% | 0%   | 13.6% |
| 71 | 57.3% | 31.0% | 0%   | 11.7% |
| 72 | 56.6% | 30.6% | 0%   | 12.8% |
| 73 | 50.4% | 17.9% | 0%   | 31.7% |
| 74 | 57.7% | 27.2% | 0%   | 15.1% |
| 75 | 48.1% | 25.7% | 0%   | 26.2% |
| 76 | 35.2% | 6.9%  | 0%   | 58.0% |
| 77 | 53.8% | 28.7% | 0%   | 17.5% |
| 78 | 56.4% | 27.4% | 0%   | 16.2% |
| 79 | 50.3% | 17.3% | 0%   | 32.4% |
| 80 | 55.3% | 23.3% | 0%   | 21.5% |
| 81 | 57.1% | 24.9% | 0.1% | 17.9% |
| 82 | 57.4% | 29.2% | 0.2% | 13.2% |
| 83 | 52.1% | 29.7% | 0%   | 18.3% |
| 84 | 52.9% | 21.1% | 0%   | 26.0% |
| 85 | 65.4% | 18.9% | 0.2% | 15.4% |
| 86 | 10.9% | 2.5%  | 0%   | 86.6% |
| 87 | 54.4% | 27.3% | 0%   | 18.3% |
| 88 | 53.2% | 28.4% | 0%   | 18.4% |
| 89 | 56.5% | 30.1% | 0%   | 13.5% |
| 90 | 49.7% | 17.9% | 0%   | 32.4% |
| 91 | 56.6% | 32.3% | 0%   | 11.1% |
| 92 | 56.1% | 30.7% | 0%   | 13.2% |
| 93 | 58.8% | 24.7% | 0%   | 16.5% |
| 94 | 56.1% | 26.8% | 0%   | 17.1% |
| 95 | 55.8% | 36.1% | 0%   | 8.1%  |
| 96 | 58.9% | 33.0% | 0.1% | 8.0%  |
| 97 | 55.8% | 25.6% | 0%   | 18.6% |
| 98 | 56.7% | 29.5% | 0%   | 13.8% |
| 99 | 57.0% | 28.3% | 0%   | 14.7% |

Table 8. Area statistics for biofilm images after 72 hours.

| Image number | Cells | Matrix | Channels | Cells-free zone |
|--------------|-------|--------|----------|-----------------|
| 0            | 36.9% | 18.8%  | 0%       | 44.3%           |
| 1            | 7.6%  | 0.7%   | 0%       | 91.6%           |
| 2            | 8.3%  | 2.0%   | 0%       | 89.7%           |
| 3            | 51.7% | 27.1%  | 0%       | 21.2%           |
| 4            | 27.0% | 10.8%  | 0%       | 62.2%           |
| 5            | 25.3% | 8.9%   | 0%       | 65.8%           |
| 6            | 35.0% | 21.8%  | 0%       | 43.2%           |
| 7            | 8.9%  | 1.4%   | 0%       | 89.6%           |
| 8            | 28.9% | 16.6%  | 0%       | 54.5%           |
| 9            | 39.2% | 19.9%  | 0%       | 40.9%           |
| 10           | 23.3% | 19.4%  | 0%       | 57.2%           |
| 11           | 13.3% | 2.2%   | 0%       | 84.6%           |
| 12           | 25.5% | 13.4%  | 0%       | 61.1%           |
| 13           | 35.8% | 13.7%  | 0%       | 50.5%           |
| 14           | 52.8% | 31.1%  | 0%       | 16.1%           |
| 15           | 13.4% | 4.3%   | 0%       | 82.3%           |
| 16           | 43.3% | 24.4%  | 0%       | 32.3%           |
| 17           | 54.2% | 24.3%  | 0.1%     | 21.4%           |
| 18           | 33.5% | 21.0%  | 0%       | 45.5%           |
| 19           | 31.2% | 20.0%  | 0%       | 48.8%           |
| 20           | 28.5% | 15.7%  | 0%       | 55.8%           |
| 21           | 18.6% | 4.4%   | 0%       | 77.0%           |
| 22           | 32.4% | 11.6%  | 0%       | 56.0%           |
| 23           | 16.2% | 10.8%  | 0%       | 73.0%           |
| 24           | 44.6% | 25.9%  | 0%       | 29.4%           |
| 25           | 47.6% | 23.1%  | 0%       | 29.4%           |
| 26           | 7.1%  | 1.8%   | 0%       | 91.1%           |
| 27           | 43.8% | 25.6%  | 0%       | 30.7%           |
| 28           | 52.8% | 25.5%  | 0%       | 21.7%           |
| 29           | 49.1% | 22.1%  | 0%       | 28.8%           |
| 30           | 26.9% | 15.7%  | 0%       | 57.4%           |
| 31           | 24.4% | 7.2%   | 0%       | 68.5%           |
| 32           | 12.8% | 3.0%   | 0%       | 84.1%           |
| 33           | 27.5% | 28.9%  | 0%       | 43.5%           |
| 34           | 31.2% | 17.8%  | 0%       | 51.0%           |
| 35           | 36.7% | 24.1%  | 0%       | 39.2%           |
| 36           | 55.0% | 29.4%  | 0%       | 15.6%           |
| 37           | 13.3% | 11.5%  | 0%       | 75.2%           |
| 38           | 45.7% | 26.7%  | 0%       | 27.6%           |
| 39           | 54.6% | 29.9%  | 0%       | 15.5%           |
| 40           | 20.9% | 6.2%   | 0%       | 72.9%           |
| 41           | 28.6% | 18.8%  | 0%       | 52.6%           |
| 42           | 19.3% | 10.7%  | 0%       | 70.1%           |
| 43           | 15.4% | 18.6%  | 0%       | 66.0%           |

|    |       |       |      |       |
|----|-------|-------|------|-------|
| 44 | 24.9% | 13.4% | 0%   | 61.7% |
| 45 | 26.8% | 16.6% | 0%   | 56.6% |
| 46 | 35.9% | 14.7% | 0%   | 49.5% |
| 47 | 52.9% | 28.4% | 0.2% | 18.6% |
| 48 | 31.3% | 17.2% | 0%   | 51.4% |
| 49 | 49.5% | 22.2% | 0%   | 28.3% |
| 50 | 38.2% | 24.9% | 0%   | 36.9% |
| 51 | 29.8% | 17.1% | 0%   | 53.1% |
| 52 | 28.8% | 22.0% | 0%   | 49.2% |
| 53 | 35.2% | 23.4% | 0%   | 41.3% |
| 54 | 40.1% | 30.6% | 0%   | 29.3% |
| 55 | 27.9% | 17.1% | 0%   | 55.1% |
| 56 | 14.4% | 4.8%  | 0%   | 80.8% |
| 57 | 29.5% | 15.9% | 0%   | 54.6% |
| 58 | 51.2% | 29.8% | 0%   | 19.0% |
| 59 | 42.2% | 16.9% | 0%   | 40.9% |
| 60 | 57.3% | 33.8% | 0%   | 8.8%  |
| 61 | 46.6% | 27.5% | 0%   | 25.9% |
| 62 | 30.4% | 26.4% | 0%   | 43.2% |
| 63 | 31.5% | 21.6% | 0%   | 46.8% |
| 64 | 44.7% | 28.3% | 0%   | 27.1% |
| 65 | 28.9% | 31.2% | 0%   | 39.8% |
| 66 | 18.0% | 6.6%  | 0%   | 75.4% |
| 67 | 20.4% | 9.0%  | 0%   | 70.6% |
| 68 | 35.1% | 19.8% | 0%   | 45.0% |
| 69 | 50.5% | 27.3% | 0%   | 22.1% |
| 70 | 55.1% | 34.6% | 0%   | 10.2% |
| 71 | 53.4% | 39.5% | 0%   | 7.1%  |
| 72 | 52.8% | 36.4% | 0%   | 10.7% |
| 73 | 39.1% | 24.6% | 0%   | 36.3% |
| 74 | 33.8% | 25.1% | 0%   | 41.1% |
| 75 | 51.1% | 25.2% | 0%   | 23.8% |
| 76 | 33.7% | 14.9% | 0%   | 51.3% |
| 77 | 48.1% | 14.4% | 0%   | 37.5% |
| 78 | 17.4% | 9.5%  | 0%   | 73.1% |
| 79 | 39.3% | 26.9% | 0%   | 33.8% |
| 80 | 0.3%  | 0.6%  | 0%   | 99.1% |
| 81 | 47.7% | 21.3% | 0.2% | 30.8% |
| 82 | 55.6% | 37.4% | 0.1% | 6.9%  |
| 83 | 54.0% | 32.4% | 0%   | 13.6% |
| 84 | 52.4% | 26.4% | 0.1% | 21.1% |
| 85 | 44.8% | 29.9% | 0%   | 25.3% |
| 86 | 43.8% | 15.9% | 0%   | 40.3% |
| 87 | 22.0% | 23.7% | 0%   | 54.3% |
| 88 | 45.3% | 29.3% | 0%   | 25.4% |
| 89 | 35.8% | 9.9%  | 0%   | 54.3% |
| 90 | 0.4%  | 0.5%  | 0%   | 99.1% |
| 91 | 0.3%  | 0.5%  | 0%   | 99.2% |

|    |       |       |      |       |
|----|-------|-------|------|-------|
| 92 | 20.5% | 2.9%  | 0%   | 76.6% |
| 93 | 55.3% | 36.3% | 0.1% | 8.3%  |
| 94 | 55.9% | 36.6% | 0%   | 7.5%  |
| 95 | 52.8% | 36.4% | 0%   | 10.8% |
| 96 | 50.8% | 34.6% | 0%   | 14.6% |
| 97 | 37.1% | 20.0% | 0%   | 42.9% |
| 98 | 46.9% | 16.1% | 0%   | 37.0% |
| 99 | 52.2% | 26.0% | 0.0% | 21.7% |

Table 9. Area statistics for biofilm images after 96 hours.

| Image number | Cells | Matrix | Channels | Cells-free zone |
|--------------|-------|--------|----------|-----------------|
| 0            | 6.4%  | 0.6%   | 0%       | 93.0%           |
| 1            | 12.9% | 3.3%   | 0%       | 83.8%           |
| 2            | 7.4%  | 2.0%   | 0%       | 90.6%           |
| 3            | 23.6% | 17.8%  | 0%       | 58.6%           |
| 4            | 56.8% | 31.3%  | 0.1%     | 11.9%           |
| 5            | 56.3% | 36.1%  | 0.1%     | 7.5%            |
| 6            | 57.1% | 33.6%  | 0.1%     | 9.2%            |
| 7            | 53.6% | 32.9%  | 0.1%     | 13.5%           |
| 8            | 55.5% | 34.1%  | 0%       | 10.4%           |
| 9            | 56.8% | 32.6%  | 0.1%     | 10.4%           |
| 10           | 6.3%  | 1.8%   | 0%       | 91.9%           |
| 11           | 5.7%  | 1.4%   | 0%       | 92.9%           |
| 12           | 10.5% | 6.2%   | 0%       | 83.3%           |
| 13           | 26.8% | 11.4%  | 0%       | 61.9%           |
| 14           | 54.7% | 37.1%  | 0.1%     | 8.1%            |
| 15           | 54.8% | 31.7%  | 0%       | 13.5%           |
| 16           | 55.4% | 37.5%  | 0.2%     | 6.9%            |
| 17           | 55.5% | 36.2%  | 0.1%     | 8.2%            |
| 18           | 54.2% | 34.2%  | 0%       | 11.5%           |
| 19           | 57.7% | 31.8%  | 0%       | 10.5%           |
| 20           | 7.1%  | 1.8%   | 0%       | 91.1%           |
| 21           | 8.3%  | 4.3%   | 0%       | 87.5%           |
| 22           | 23.6% | 12.8%  | 0%       | 63.7%           |
| 23           | 36.9% | 30.3%  | 0%       | 32.8%           |
| 24           | 51.8% | 34.5%  | 0%       | 13.7%           |
| 25           | 56.0% | 34.7%  | 0%       | 9.3%            |
| 26           | 52.3% | 37.0%  | 0%       | 10.7%           |
| 27           | 52.5% | 36.0%  | 0%       | 11.5%           |
| 28           | 55.1% | 35.3%  | 0.3%     | 9.3%            |
| 29           | 57.4% | 33.3%  | 0.4%     | 8.9%            |
| 30           | 6.8%  | 0.7%   | 0%       | 92.5%           |
| 31           | 9.6%  | 2.5%   | 0%       | 88.0%           |
| 32           | 24.3% | 13.3%  | 0%       | 62.4%           |
| 33           | 47.0% | 29.2%  | 0%       | 23.8%           |
| 34           | 54.2% | 36.0%  | 0.1%     | 9.7%            |

|    |       |       |      |       |
|----|-------|-------|------|-------|
| 35 | 53.2% | 34.3% | 0%   | 12.5% |
| 36 | 56.0% | 37.0% | 0%   | 7.0%  |
| 37 | 52.6% | 39.3% | 0%   | 8.1%  |
| 38 | 56.6% | 36.6% | 0.1% | 6.8%  |
| 39 | 58.7% | 33.6% | 0.1% | 7.6%  |
| 40 | 30.2% | 22.0% | 0%   | 47.8% |
| 41 | 31.2% | 23.9% | 0%   | 44.9% |
| 42 | 19.2% | 12.8% | 0%   | 68.0% |
| 43 | 43.7% | 24.0% | 0%   | 32.2% |
| 44 | 54.3% | 31.0% | 0%   | 14.7% |
| 45 | 55.3% | 35.8% | 0%   | 9.0%  |
| 46 | 56.5% | 36.9% | 0.1% | 6.5%  |
| 47 | 51.5% | 37.6% | 0.1% | 10.8% |
| 48 | 53.4% | 36.7% | 0%   | 9.9%  |
| 49 | 52.6% | 36.3% | 0%   | 11.1% |
| 50 | 45.9% | 12.1% | 0%   | 42.1% |
| 51 | 27.8% | 9.0%  | 0%   | 63.1% |
| 52 | 32.2% | 27.3% | 0%   | 40.5% |
| 53 | 39.1% | 31.1% | 0%   | 29.8% |
| 54 | 51.7% | 28.0% | 0%   | 20.3% |
| 55 | 54.4% | 36.1% | 0%   | 9.5%  |
| 56 | 52.8% | 36.7% | 0.1% | 10.4% |
| 57 | 46.4% | 29.9% | 0%   | 23.7% |
| 58 | 49.2% | 32.9% | 0%   | 17.8% |
| 59 | 49.5% | 35.0% | 0%   | 15.5% |
| 60 | 55.5% | 36.0% | 0.2% | 8.2%  |
| 61 | 32.7% | 20.2% | 0%   | 47.1% |
| 62 | 40.8% | 26.9% | 0%   | 32.3% |
| 63 | 36.2% | 31.2% | 0%   | 32.5% |
| 64 | 49.5% | 31.8% | 0.1% | 18.6% |
| 65 | 54.1% | 25.4% | 0%   | 20.5% |
| 66 | 48.2% | 23.9% | 0%   | 27.9% |
| 67 | 47.4% | 24.8% | 0%   | 27.8% |
| 68 | 50.4% | 27.7% | 0%   | 21.9% |
| 69 | 47.8% | 30.9% | 0%   | 21.3% |
| 70 | 56.0% | 34.8% | 0.1% | 9.1%  |
| 71 | 34.0% | 17.3% | 0%   | 48.6% |
| 72 | 20.5% | 11.8% | 0%   | 67.7% |
| 73 | 45.6% | 33.0% | 0%   | 21.4% |
| 74 | 42.5% | 34.8% | 0%   | 22.6% |
| 75 | 37.8% | 28.0% | 0%   | 34.2% |
| 76 | 42.0% | 19.2% | 0%   | 38.8% |
| 77 | 40.5% | 20.4% | 0%   | 39.1% |
| 78 | 47.6% | 32.6% | 0%   | 19.8% |
| 79 | 51.1% | 25.2% | 0%   | 23.7% |
| 80 | 53.4% | 37.2% | 0.1% | 9.3%  |
| 81 | 31.6% | 24.7% | 0%   | 43.7% |
| 82 | 33.9% | 26.4% | 0%   | 39.7% |

|    |       |       |    |       |
|----|-------|-------|----|-------|
| 83 | 45.1% | 30.3% | 0% | 24.6% |
| 84 | 49.0% | 29.7% | 0% | 21.3% |
| 85 | 37.1% | 21.5% | 0% | 41.3% |
| 86 | 42.1% | 26.0% | 0% | 31.8% |
| 87 | 45.9% | 25.8% | 0% | 28.3% |
| 88 | 52.0% | 27.6% | 0% | 20.4% |
| 89 | 50.2% | 37.1% | 0% | 12.7% |
| 90 | 54.6% | 36.4% | 0% | 8.9%  |
| 91 | 39.2% | 20.8% | 0% | 40.0% |
| 92 | 35.4% | 28.6% | 0% | 36.0% |
| 93 | 39.7% | 27.3% | 0% | 33.0% |
| 94 | 45.3% | 24.8% | 0% | 29.9% |
| 95 | 35.8% | 20.6% | 0% | 43.6% |
| 96 | 45.5% | 25.5% | 0% | 29.0% |
| 97 | 49.6% | 31.0% | 0% | 19.4% |
| 98 | 53.5% | 34.3% | 0% | 12.2% |
| 99 | 49.0% | 32.3% | 0% | 18.7% |

### 3.5 Neural network-based predictions of large amounts of SEM images for the study of biocide effects

Here, we report statistics of segmentation class areas and cell counts on each image, which were used in the comparison of different antibiotic impacts.

*Table 10. Statistics of Benzalkonium chloride impact.*

| <b>Image number</b> | <b>Cells</b> | <b>Matrix</b> | <b>Cells-free zone</b> | <b>Number of cells</b> |
|---------------------|--------------|---------------|------------------------|------------------------|
| 0                   | 39.8%        | 9.5%          | 50.7%                  | 137                    |
| 1                   | 41.2%        | 11.2%         | 47.6%                  | 125                    |
| 2                   | 37.0%        | 11.1%         | 51.9%                  | 112                    |
| 3                   | 28.7%        | 4.1%          | 67.2%                  | 79                     |
| 4                   | 41.8%        | 5.8%          | 52.4%                  | 129                    |
| 5                   | 37.1%        | 8.5%          | 54.4%                  | 107                    |
| 6                   | 23.2%        | 3.6%          | 73.2%                  | 71                     |
| 7                   | 41.3%        | 7.9%          | 50.8%                  | 135                    |
| 8                   | 40.1%        | 17.4%         | 42.4%                  | 133                    |
| 9                   | 38.7%        | 12.2%         | 49.0%                  | 115                    |
| 10                  | 37.9%        | 7.2%          | 54.9%                  | 111                    |
| 11                  | 39.4%        | 7.0%          | 53.6%                  | 114                    |
| 12                  | 36.1%        | 10.0%         | 54.0%                  | 103                    |
| 13                  | 22.3%        | 11.3%         | 66.4%                  | 66                     |
| 14                  | 42.9%        | 7.0%          | 50.1%                  | 131                    |
| 15                  | 29.2%        | 49.6%         | 21.2%                  | 63                     |
| 16                  | 27.1%        | 4.9%          | 68.0%                  | 79                     |
| 17                  | 40.6%        | 7.4%          | 52.0%                  | 131                    |
| 18                  | 38.8%        | 10.6%         | 50.6%                  | 123                    |
| 19                  | 38.0%        | 6.9%          | 55.1%                  | 116                    |
| 20                  | 7.1%         | 2.1%          | 90.8%                  | 21                     |
| 21                  | 40.7%        | 9.5%          | 49.8%                  | 120                    |



|    |       |       |       |     |
|----|-------|-------|-------|-----|
| 22 | 32.0% | 7.7%  | 60.3% | 90  |
| 23 | 30.5% | 17.5% | 52.0% | 94  |
| 24 | 39.5% | 11.1% | 49.3% | 125 |
| 25 | 27.5% | 24.5% | 48.0% | 81  |
| 26 | 25.2% | 40.3% | 34.4% | 75  |
| 27 | 38.7% | 16.4% | 44.8% | 115 |
| 28 | 30.1% | 34.2% | 35.7% | 96  |
| 29 | 39.1% | 9.0%  | 51.9% | 116 |
| 30 | 0.3%  | 0.4%  | 99.3% | 4   |
| 31 | 36.4% | 19.4% | 44.2% | 109 |
| 32 | 38.3% | 10.1% | 51.6% | 113 |
| 33 | 34.3% | 14.1% | 51.6% | 102 |
| 34 | 39.6% | 13.8% | 46.6% | 127 |
| 35 | 6.9%  | 3.3%  | 89.8% | 22  |
| 36 | 13.8% | 20.1% | 66.0% | 49  |
| 37 | 38.5% | 7.1%  | 54.4% | 122 |
| 38 | 40.0% | 7.4%  | 52.7% | 133 |
| 39 | 41.6% | 11.5% | 46.8% | 126 |
| 40 | 0.4%  | 1.1%  | 98.5% | 4   |
| 41 | 22.9% | 37.7% | 39.3% | 73  |
| 42 | 39.3% | 8.3%  | 52.5% | 123 |
| 43 | 37.8% | 14.3% | 47.9% | 113 |
| 44 | 22.5% | 44.5% | 33.0% | 65  |
| 45 | 38.3% | 19.7% | 42.1% | 114 |
| 46 | 38.1% | 9.9%  | 52.0% | 109 |
| 47 | 41.2% | 6.0%  | 52.8% | 131 |
| 48 | 42.1% | 10.3% | 47.7% | 141 |
| 49 | 39.4% | 9.7%  | 50.9% | 125 |
| 50 | 0.7%  | 0.5%  | 98.8% | 5   |
| 51 | 19.7% | 15.3% | 65.0% | 65  |
| 52 | 33.9% | 9.6%  | 56.5% | 99  |
| 53 | 33.9% | 13.6% | 52.5% | 107 |
| 54 | 40.9% | 14.0% | 45.0% | 134 |
| 55 | 41.0% | 9.8%  | 49.2% | 133 |
| 56 | 41.4% | 9.7%  | 48.9% | 130 |
| 57 | 41.8% | 7.6%  | 50.7% | 128 |
| 58 | 11.7% | 1.5%  | 86.8% | 38  |
| 59 | 38.2% | 7.4%  | 54.5% | 114 |
| 60 | 0.5%  | 0.5%  | 99.0% | 5   |
| 61 | 17.2% | 1.5%  | 81.2% | 53  |
| 62 | 34.3% | 6.0%  | 59.7% | 101 |
| 63 | 36.8% | 4.4%  | 58.8% | 109 |
| 64 | 42.5% | 8.7%  | 48.8% | 129 |
| 65 | 38.7% | 11.3% | 50.0% | 123 |
| 66 | 38.7% | 11.5% | 49.9% | 118 |
| 67 | 42.6% | 12.5% | 44.9% | 132 |
| 68 | 40.4% | 6.9%  | 52.7% | 125 |
| 69 | 37.6% | 9.0%  | 53.4% | 109 |

|    |       |       |       |     |
|----|-------|-------|-------|-----|
| 70 | 0.5%  | 0.3%  | 99.1% | 4   |
| 71 | 18.1% | 2.0%  | 79.9% | 55  |
| 72 | 34.7% | 6.5%  | 58.8% | 104 |
| 73 | 43.5% | 8.8%  | 47.7% | 133 |
| 74 | 42.3% | 10.2% | 47.5% | 137 |
| 75 | 39.5% | 9.0%  | 51.5% | 127 |
| 76 | 12.6% | 13.6% | 73.8% | 44  |
| 77 | 40.6% | 8.0%  | 51.4% | 129 |
| 78 | 38.7% | 7.8%  | 53.5% | 117 |
| 79 | 39.8% | 9.3%  | 50.9% | 121 |
| 80 | 0.5%  | 0.8%  | 98.6% | 6   |
| 81 | 24.0% | 2.4%  | 73.6% | 82  |
| 82 | 36.8% | 9.8%  | 53.4% | 106 |
| 83 | 37.7% | 9.7%  | 52.5% | 126 |
| 84 | 21.5% | 35.5% | 43.0% | 56  |
| 85 | 39.3% | 9.5%  | 51.2% | 121 |
| 86 | 42.3% | 8.1%  | 49.6% | 140 |
| 87 | 36.9% | 6.2%  | 56.9% | 115 |
| 88 | 41.4% | 11.3% | 47.4% | 128 |
| 89 | 38.2% | 45.8% | 16.0% | 102 |
| 90 | 0.7%  | 0.6%  | 98.8% | 4   |
| 91 | 24.2% | 2.2%  | 73.6% | 77  |
| 92 | 29.1% | 50.3% | 20.6% | 83  |
| 93 | 40.2% | 7.2%  | 52.6% | 130 |
| 94 | 39.3% | 9.1%  | 51.6% | 122 |
| 95 | 39.2% | 8.0%  | 52.8% | 124 |
| 96 | 39.4% | 5.9%  | 54.7% | 122 |
| 97 | 35.5% | 28.4% | 36.0% | 112 |
| 98 | 26.9% | 44.0% | 29.0% | 88  |
| 99 | 24.9% | 40.9% | 34.2% | 76  |

Table 11. Statistics of Gentamycin impact.

| Image number | Cells | Matrix | Cells-free zone | Number of cells |
|--------------|-------|--------|-----------------|-----------------|
| 0            | 9.7%  | 0.6%   | 89.7%           | 32              |
| 1            | 32.1% | 7.1%   | 60.9%           | 107             |
| 2            | 17.1% | 6.9%   | 76.0%           | 63              |
| 3            | 13.8% | 3.6%   | 82.5%           | 42              |
| 4            | 27.8% | 10.7%  | 61.5%           | 85              |
| 5            | 21.0% | 1.9%   | 77.1%           | 58              |
| 6            | 35.9% | 4.9%   | 59.2%           | 125             |
| 7            | 31.9% | 2.2%   | 65.9%           | 111             |
| 8            | 29.0% | 2.1%   | 68.9%           | 93              |
| 9            | 36.1% | 5.2%   | 58.7%           | 121             |
| 10           | 25.3% | 3.4%   | 71.3%           | 81              |
| 11           | 31.5% | 13.9%  | 54.6%           | 109             |
| 12           | 28.8% | 3.4%   | 67.8%           | 87              |

|    |       |       |       |     |
|----|-------|-------|-------|-----|
| 13 | 21.6% | 3.6%  | 74.9% | 75  |
| 14 | 29.4% | 4.9%  | 65.7% | 97  |
| 15 | 29.6% | 3.5%  | 66.9% | 104 |
| 16 | 35.9% | 5.6%  | 58.4% | 131 |
| 17 | 31.7% | 1.9%  | 66.4% | 97  |
| 18 | 21.4% | 1.9%  | 76.7% | 70  |
| 19 | 27.4% | 7.0%  | 65.6% | 89  |
| 20 | 34.6% | 8.3%  | 57.1% | 107 |
| 21 | 35.4% | 6.0%  | 58.5% | 117 |
| 22 | 9.9%  | 0.8%  | 89.3% | 16  |
| 23 | 20.1% | 6.4%  | 73.6% | 66  |
| 24 | 26.7% | 3.3%  | 70.0% | 88  |
| 25 | 29.3% | 8.3%  | 62.4% | 98  |
| 26 | 30.5% | 7.8%  | 61.7% | 99  |
| 27 | 27.3% | 2.2%  | 70.4% | 84  |
| 28 | 22.9% | 3.9%  | 73.2% | 70  |
| 29 | 27.6% | 26.6% | 45.7% | 91  |
| 30 | 32.9% | 8.7%  | 58.4% | 109 |
| 31 | 34.4% | 16.9% | 48.6% | 119 |
| 32 | 19.8% | 2.9%  | 77.3% | 57  |
| 33 | 17.2% | 3.6%  | 79.1% | 57  |
| 34 | 27.1% | 3.8%  | 69.1% | 91  |
| 35 | 14.0% | 0.5%  | 85.5% | 45  |
| 36 | 20.0% | 4.7%  | 75.3% | 67  |
| 37 | 28.4% | 4.4%  | 67.2% | 91  |
| 38 | 28.0% | 3.7%  | 68.3% | 88  |
| 39 | 25.2% | 9.4%  | 65.4% | 81  |
| 40 | 34.9% | 11.4% | 53.7% | 102 |
| 41 | 37.0% | 6.4%  | 56.6% | 133 |
| 42 | 14.7% | 1.8%  | 83.4% | 48  |
| 43 | 7.9%  | 0.4%  | 91.7% | 28  |
| 44 | 31.2% | 3.4%  | 65.4% | 109 |
| 45 | 20.0% | 3.0%  | 77.0% | 66  |
| 46 | 25.2% | 3.8%  | 71.0% | 77  |
| 47 | 24.9% | 2.4%  | 72.7% | 83  |
| 48 | 30.2% | 6.7%  | 63.1% | 100 |
| 49 | 31.6% | 7.0%  | 61.4% | 95  |
| 50 | 37.6% | 6.4%  | 56.0% | 132 |
| 51 | 40.1% | 11.4% | 48.5% | 129 |
| 52 | 22.4% | 1.3%  | 76.4% | 77  |
| 53 | 18.6% | 3.0%  | 78.5% | 61  |
| 54 | 28.1% | 3.5%  | 68.4% | 90  |
| 55 | 29.4% | 3.8%  | 66.8% | 92  |
| 56 | 32.3% | 6.1%  | 61.6% | 109 |
| 57 | 27.4% | 9.8%  | 62.8% | 85  |
| 58 | 26.9% | 1.9%  | 71.2% | 87  |
| 59 | 31.1% | 12.5% | 56.4% | 99  |
| 60 | 39.3% | 10.3% | 50.4% | 130 |

|    |       |       |       |     |
|----|-------|-------|-------|-----|
| 61 | 39.7% | 16.9% | 43.4% | 134 |
| 62 | 16.0% | 1.0%  | 83.1% | 51  |
| 63 | 17.8% | 8.2%  | 74.0% | 58  |
| 64 | 31.8% | 2.1%  | 66.2% | 103 |
| 65 | 32.2% | 10.1% | 57.8% | 101 |
| 66 | 29.5% | 4.5%  | 66.0% | 99  |
| 67 | 25.3% | 3.4%  | 71.3% | 84  |
| 68 | 28.7% | 4.0%  | 67.3% | 92  |
| 69 | 32.7% | 6.3%  | 61.0% | 101 |
| 70 | 44.5% | 10.3% | 45.2% | 148 |
| 71 | 35.6% | 6.7%  | 57.7% | 111 |
| 72 | 12.9% | 0.3%  | 86.8% | 46  |
| 73 | 25.1% | 4.9%  | 70.1% | 85  |
| 74 | 35.5% | 2.7%  | 61.9% | 120 |
| 75 | 34.7% | 10.6% | 54.7% | 110 |
| 76 | 26.3% | 3.8%  | 69.9% | 81  |
| 77 | 29.6% | 4.5%  | 65.9% | 97  |
| 78 | 28.9% | 2.7%  | 68.4% | 91  |
| 79 | 24.4% | 8.9%  | 66.7% | 71  |
| 80 | 37.7% | 5.3%  | 57.1% | 125 |
| 81 | 36.0% | 8.5%  | 55.5% | 120 |
| 82 | 23.1% | 3.9%  | 73.1% | 77  |
| 83 | 35.5% | 6.3%  | 58.2% | 120 |
| 84 | 37.4% | 6.0%  | 56.6% | 119 |
| 85 | 35.2% | 4.6%  | 60.2% | 112 |
| 86 | 31.4% | 4.3%  | 64.3% | 104 |
| 87 | 32.1% | 13.3% | 54.6% | 102 |
| 88 | 31.3% | 4.2%  | 64.5% | 101 |
| 89 | 19.7% | 3.5%  | 76.8% | 60  |
| 90 | 27.2% | 1.3%  | 71.5% | 88  |
| 91 | 23.3% | 10.0% | 66.7% | 76  |
| 92 | 26.8% | 5.7%  | 67.5% | 94  |
| 93 | 33.8% | 9.4%  | 56.9% | 117 |
| 94 | 36.0% | 6.3%  | 57.7% | 124 |
| 95 | 34.8% | 10.6% | 54.6% | 113 |
| 96 | 27.2% | 4.0%  | 68.8% | 82  |
| 97 | 30.5% | 4.8%  | 64.6% | 97  |
| 98 | 28.6% | 3.8%  | 67.7% | 87  |
| 99 | 30.9% | 4.0%  | 65.1% | 95  |

Table 12. Statistics of Chloramphenicol impact.

| Image number | Cells | Matrix | Cells-free zone | Number of cells |
|--------------|-------|--------|-----------------|-----------------|
| 0            | 32.1% | 3.4%   | 64.5%           | 113             |
| 1            | 28.4% | 1.0%   | 70.6%           | 81              |
| 2            | 20.9% | 1.0%   | 78.1%           | 66              |
| 3            | 34.7% | 6.3%   | 59.0%           | 128             |

|    |       |       |       |     |
|----|-------|-------|-------|-----|
| 4  | 42.4% | 8.3%  | 49.4% | 140 |
| 5  | 57.1% | 24.6% | 18.3% | 206 |
| 6  | 50.0% | 16.6% | 33.3% | 175 |
| 7  | 36.5% | 6.3%  | 57.3% | 122 |
| 8  | 41.0% | 6.1%  | 52.9% | 144 |
| 9  | 32.5% | 2.5%  | 65.0% | 109 |
| 10 | 28.4% | 2.1%  | 69.5% | 101 |
| 11 | 37.9% | 5.0%  | 57.1% | 130 |
| 12 | 19.7% | 1.0%  | 79.4% | 62  |
| 13 | 40.4% | 5.4%  | 54.2% | 131 |
| 14 | 41.2% | 6.9%  | 51.9% | 133 |
| 15 | 42.8% | 7.7%  | 49.6% | 147 |
| 16 | 33.3% | 2.6%  | 64.0% | 104 |
| 17 | 37.9% | 5.0%  | 57.1% | 127 |
| 18 | 26.2% | 1.5%  | 72.2% | 82  |
| 19 | 22.6% | 1.5%  | 75.9% | 76  |
| 20 | 34.3% | 3.6%  | 62.1% | 121 |
| 21 | 40.9% | 6.7%  | 52.4% | 143 |
| 22 | 38.8% | 5.5%  | 55.7% | 129 |
| 23 | 38.1% | 5.0%  | 56.9% | 130 |
| 24 | 35.0% | 3.8%  | 61.2% | 122 |
| 25 | 37.6% | 6.2%  | 56.3% | 125 |
| 26 | 32.7% | 3.1%  | 64.1% | 105 |
| 27 | 28.5% | 2.5%  | 69.0% | 94  |
| 28 | 37.8% | 5.0%  | 57.2% | 130 |
| 29 | 28.3% | 2.4%  | 69.3% | 90  |
| 30 | 31.0% | 2.4%  | 66.6% | 109 |
| 31 | 38.0% | 4.5%  | 57.5% | 124 |
| 32 | 44.4% | 9.5%  | 46.0% | 149 |
| 33 | 40.7% | 6.4%  | 52.9% | 138 |
| 34 | 40.3% | 6.2%  | 53.5% | 142 |
| 35 | 32.1% | 2.3%  | 65.6% | 103 |
| 36 | 32.3% | 2.5%  | 65.2% | 113 |
| 37 | 35.5% | 5.0%  | 59.5% | 122 |
| 38 | 24.2% | 1.6%  | 74.1% | 78  |
| 39 | 26.9% | 2.7%  | 70.4% | 85  |
| 40 | 52.6% | 27.4% | 20.0% | 177 |
| 41 | 47.4% | 18.2% | 34.4% | 164 |
| 42 | 39.9% | 17.8% | 42.3% | 124 |
| 43 | 41.9% | 7.2%  | 50.9% | 138 |
| 44 | 43.2% | 8.5%  | 48.3% | 144 |
| 45 | 33.3% | 2.4%  | 64.3% | 92  |
| 46 | 33.5% | 3.4%  | 63.1% | 116 |
| 47 | 36.2% | 4.1%  | 59.7% | 129 |
| 48 | 24.7% | 0.9%  | 74.4% | 75  |
| 49 | 29.9% | 3.1%  | 67.0% | 100 |
| 50 | 28.3% | 2.5%  | 69.2% | 92  |
| 51 | 35.4% | 5.0%  | 59.6% | 108 |

|    |       |      |       |     |
|----|-------|------|-------|-----|
| 52 | 40.9% | 6.7% | 52.4% | 132 |
| 53 | 31.2% | 7.6% | 61.3% | 101 |
| 54 | 39.2% | 5.6% | 55.2% | 128 |
| 55 | 44.2% | 8.1% | 47.7% | 154 |
| 56 | 38.0% | 3.3% | 58.7% | 123 |
| 57 | 35.9% | 4.2% | 59.9% | 122 |
| 58 | 36.0% | 4.4% | 59.6% | 123 |
| 59 | 38.2% | 5.2% | 56.6% | 138 |
| 60 | 36.7% | 5.0% | 58.4% | 117 |
| 61 | 39.4% | 5.4% | 55.1% | 125 |
| 62 | 27.2% | 3.6% | 69.2% | 84  |
| 63 | 37.5% | 5.9% | 56.6% | 124 |
| 64 | 35.7% | 3.9% | 60.4% | 112 |
| 65 | 37.5% | 4.9% | 57.7% | 120 |
| 66 | 28.8% | 2.5% | 68.7% | 98  |
| 67 | 32.6% | 3.6% | 63.8% | 115 |
| 68 | 37.6% | 5.0% | 57.4% | 128 |
| 69 | 29.6% | 7.8% | 62.6% | 99  |
| 70 | 41.9% | 5.3% | 52.8% | 137 |
| 71 | 39.6% | 5.3% | 55.1% | 134 |
| 72 | 36.0% | 3.2% | 60.8% | 122 |
| 73 | 39.5% | 5.5% | 55.0% | 133 |
| 74 | 35.3% | 4.0% | 60.7% | 117 |
| 75 | 22.3% | 0.6% | 77.1% | 69  |
| 76 | 23.3% | 1.6% | 75.2% | 76  |
| 77 | 22.7% | 2.2% | 75.1% | 71  |
| 78 | 24.7% | 2.4% | 72.9% | 81  |
| 79 | 20.5% | 1.1% | 78.4% | 65  |
| 80 | 41.3% | 8.8% | 49.9% | 138 |
| 81 | 44.2% | 7.5% | 48.3% | 148 |
| 82 | 46.2% | 7.7% | 46.0% | 163 |
| 83 | 37.1% | 4.5% | 58.4% | 126 |
| 84 | 36.3% | 3.2% | 60.5% | 119 |
| 85 | 30.5% | 2.4% | 67.1% | 98  |
| 86 | 24.6% | 2.0% | 73.5% | 85  |
| 87 | 20.9% | 1.2% | 77.9% | 66  |
| 88 | 14.4% | 0.9% | 84.7% | 44  |
| 89 | 27.4% | 2.5% | 70.1% | 84  |
| 90 | 36.1% | 4.4% | 59.5% | 120 |
| 91 | 36.0% | 7.3% | 56.7% | 119 |
| 92 | 38.7% | 4.5% | 56.8% | 127 |
| 93 | 21.7% | 1.2% | 77.1% | 73  |
| 94 | 32.1% | 3.7% | 64.3% | 102 |
| 95 | 23.9% | 1.5% | 74.6% | 81  |
| 96 | 32.1% | 3.1% | 64.8% | 112 |
| 97 | 33.5% | 4.7% | 61.8% | 114 |
| 98 | 32.3% | 9.8% | 57.9% | 111 |
| 99 | 30.0% | 2.4% | 67.6% | 108 |

Table 13. Statistics of Tigecycline impact.

| Image number | Cells | Matrix | Cells-free zone | Number of cells |
|--------------|-------|--------|-----------------|-----------------|
| 0            | 46.0% | 8.3%   | 45.6%           | 160             |
| 1            | 31.1% | 3.6%   | 65.3%           | 92              |
| 2            | 10.5% | 0.5%   | 89.0%           | 37              |
| 3            | 10.5% | 0.8%   | 88.7%           | 33              |
| 4            | 16.2% | 1.1%   | 82.7%           | 58              |
| 5            | 7.3%  | 0.3%   | 92.4%           | 23              |
| 6            | 30.9% | 2.2%   | 66.9%           | 99              |
| 7            | 15.7% | 0.6%   | 83.7%           | 50              |
| 8            | 4.4%  | 0.3%   | 95.4%           | 13              |
| 9            | 8.2%  | 0.2%   | 91.5%           | 27              |
| 10           | 47.8% | 7.9%   | 44.3%           | 159             |
| 11           | 46.1% | 5.7%   | 48.2%           | 137             |
| 12           | 6.4%  | 0.4%   | 93.2%           | 18              |
| 13           | 10.4% | 0.1%   | 89.4%           | 33              |
| 14           | 18.1% | 2.3%   | 79.5%           | 54              |
| 15           | 13.3% | 0.3%   | 86.3%           | 40              |
| 16           | 44.4% | 9.3%   | 46.3%           | 135             |
| 17           | 40.3% | 12.6%  | 47.1%           | 120             |
| 18           | 16.0% | 0.4%   | 83.5%           | 50              |
| 19           | 24.7% | 1.2%   | 74.1%           | 85              |
| 20           | 50.6% | 14.6%  | 34.7%           | 167             |
| 21           | 48.6% | 9.0%   | 42.4%           | 156             |
| 22           | 40.2% | 6.4%   | 53.4%           | 132             |
| 23           | 9.8%  | 0.2%   | 90.0%           | 33              |
| 24           | 7.1%  | 0.4%   | 92.5%           | 23              |
| 25           | 14.8% | 0.6%   | 84.6%           | 42              |
| 26           | 44.8% | 7.2%   | 48.1%           | 144             |
| 27           | 46.9% | 11.4%  | 41.8%           | 151             |
| 28           | 44.7% | 7.5%   | 47.8%           | 142             |
| 29           | 43.5% | 7.2%   | 49.2%           | 136             |
| 30           | 46.9% | 8.8%   | 44.4%           | 158             |
| 31           | 50.5% | 13.3%  | 36.2%           | 167             |
| 32           | 46.6% | 9.2%   | 44.2%           | 159             |
| 33           | 13.8% | 0.4%   | 85.8%           | 41              |
| 34           | 42.7% | 7.7%   | 49.7%           | 135             |
| 35           | 44.7% | 6.5%   | 48.8%           | 138             |
| 36           | 48.1% | 8.0%   | 43.9%           | 157             |
| 37           | 46.4% | 10.7%  | 42.9%           | 149             |
| 38           | 47.1% | 7.3%   | 45.6%           | 149             |
| 39           | 46.5% | 9.0%   | 44.5%           | 141             |
| 40           | 47.0% | 9.5%   | 43.5%           | 159             |
| 41           | 48.4% | 8.6%   | 43.0%           | 163             |
| 42           | 47.3% | 12.2%  | 40.6%           | 161             |

|    |       |       |       |     |
|----|-------|-------|-------|-----|
| 43 | 38.6% | 4.5%  | 56.9% | 119 |
| 44 | 44.5% | 8.0%  | 47.5% | 143 |
| 45 | 49.0% | 8.8%  | 42.2% | 161 |
| 46 | 46.2% | 9.2%  | 44.6% | 150 |
| 47 | 47.3% | 9.4%  | 43.3% | 154 |
| 48 | 44.3% | 8.3%  | 47.4% | 138 |
| 49 | 45.2% | 7.3%  | 47.5% | 136 |
| 50 | 49.5% | 10.7% | 39.8% | 161 |
| 51 | 47.1% | 10.6% | 42.2% | 152 |
| 52 | 47.5% | 6.8%  | 45.7% | 148 |
| 53 | 49.2% | 11.2% | 39.7% | 161 |
| 54 | 46.2% | 12.7% | 41.1% | 149 |
| 55 | 45.6% | 9.1%  | 45.2% | 147 |
| 56 | 47.3% | 9.0%  | 43.6% | 155 |
| 57 | 45.6% | 9.0%  | 45.3% | 151 |
| 58 | 45.9% | 6.7%  | 47.5% | 148 |
| 59 | 44.2% | 8.3%  | 47.5% | 137 |
| 60 | 48.1% | 9.1%  | 42.7% | 157 |
| 61 | 48.5% | 11.1% | 40.4% | 159 |
| 62 | 48.5% | 10.2% | 41.3% | 165 |
| 63 | 48.1% | 13.3% | 38.7% | 157 |
| 64 | 49.6% | 13.5% | 36.9% | 162 |
| 65 | 48.1% | 10.7% | 41.2% | 160 |
| 66 | 49.0% | 10.3% | 40.7% | 164 |
| 67 | 51.2% | 10.0% | 38.8% | 165 |
| 68 | 47.2% | 9.4%  | 43.4% | 155 |
| 69 | 47.3% | 11.9% | 40.8% | 147 |
| 70 | 48.4% | 7.9%  | 43.7% | 161 |
| 71 | 46.6% | 11.1% | 42.3% | 154 |
| 72 | 50.1% | 12.6% | 37.3% | 167 |
| 73 | 50.2% | 11.2% | 38.6% | 165 |
| 74 | 52.0% | 12.4% | 35.6% | 166 |
| 75 | 47.3% | 8.6%  | 44.1% | 164 |
| 76 | 46.7% | 8.7%  | 44.6% | 155 |
| 77 | 47.4% | 10.1% | 42.4% | 158 |
| 78 | 46.3% | 7.8%  | 45.9% | 152 |
| 79 | 45.8% | 9.1%  | 45.1% | 147 |
| 80 | 47.4% | 11.0% | 41.6% | 157 |
| 81 | 50.4% | 12.8% | 36.8% | 170 |
| 82 | 48.3% | 11.5% | 40.2% | 160 |
| 83 | 47.0% | 11.0% | 42.0% | 149 |
| 84 | 50.4% | 12.1% | 37.5% | 171 |
| 85 | 48.9% | 11.8% | 39.3% | 152 |
| 86 | 46.5% | 8.8%  | 44.8% | 151 |
| 87 | 49.2% | 10.6% | 40.2% | 161 |
| 88 | 45.9% | 8.6%  | 45.5% | 150 |
| 89 | 45.8% | 10.3% | 43.9% | 153 |
| 90 | 48.6% | 10.5% | 40.9% | 164 |



|    |       |       |       |     |
|----|-------|-------|-------|-----|
| 91 | 55.4% | 15.4% | 29.0% | 189 |
| 92 | 51.3% | 12.8% | 35.9% | 165 |
| 93 | 53.3% | 14.5% | 32.2% | 181 |
| 94 | 56.3% | 21.1% | 22.3% | 190 |
| 95 | 48.2% | 9.6%  | 42.2% | 164 |
| 96 | 48.5% | 10.8% | 40.6% | 156 |
| 97 | 51.1% | 13.6% | 35.2% | 172 |
| 98 | 48.2% | 8.9%  | 42.9% | 157 |
| 99 | 49.7% | 11.6% | 38.7% | 157 |

## 4 Additional calculation details

Here, supplementary explanations of biofilm key parameter (areas of segmentation classes, number of cells, formation rate constants) estimation methodology are presented.

### 4.1 Area calculations

Areas were measured using segmentation predictions in the form of the matrix  $H \times W$ , where each pixel was labeled with a specific number, characterizing a specific segmentation class. To calculate the segmentation class area percentage on the image, the number of pixels, which were labeled as belonging to the segmentation class, was divided by the total number of pixels in the image ( $H \times W$ ).

When biofilm at a specific stage of development was characterized by multiple images, either the stitching with further area calculation procedure was performed (e.g., in section “Image analysis of biofilms at scale” in the article) or the sequential area calculation on each image with the further median estimation of area percentages for each class (e.g., in sections “Kinetic modeling of biofilm growth”, “Automated mapping of large amounts of SEM images for the investigation of antimicrobial compound impact” in the article) was carried out.

Segmentation of images, which were used for kinetic modeling, was carried out with the network, which was additionally trained on the 15 images with only empty support. These 15 images were also used in area analysis and were manually annotated as full cell-free zones.

The absolute image area was calculated using the information about pixel length.

### 4.2 Cell counts

The number of cells on the image was estimated as the number of bounding boxes after watershed implementation. When biofilm at a specific stage of development was characterized by multiple images, the total number of cells was counted as the sum of cell counts for each image. The number of cells in the biofilm macroscale region was equal to 19 064, and the number of cells on other images (500 images, which were used to evaluate antibiotic impact) was equal to 55 672. The total number of cells was 74 736.

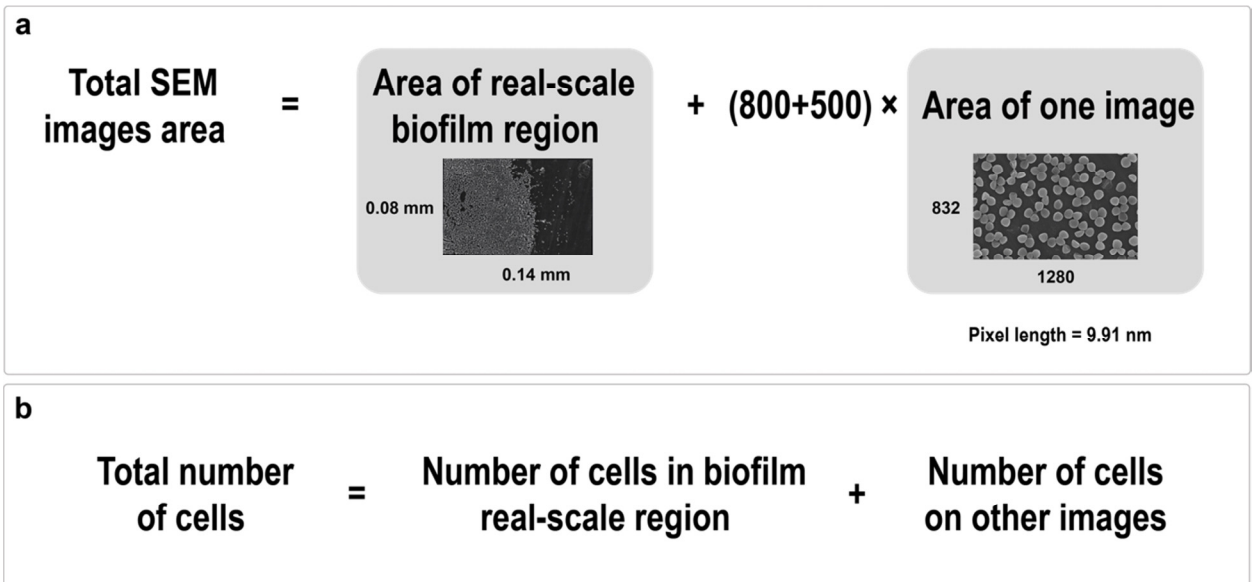

Figure 21. Formulas, which were used to estimate the amount of research. a – total SEM image area estimation. b – total number of cells estimation.

### 4.3 $K_1$ rate constant estimation

Here, we present the plot, which contains information about the rate of support coverage with cells.

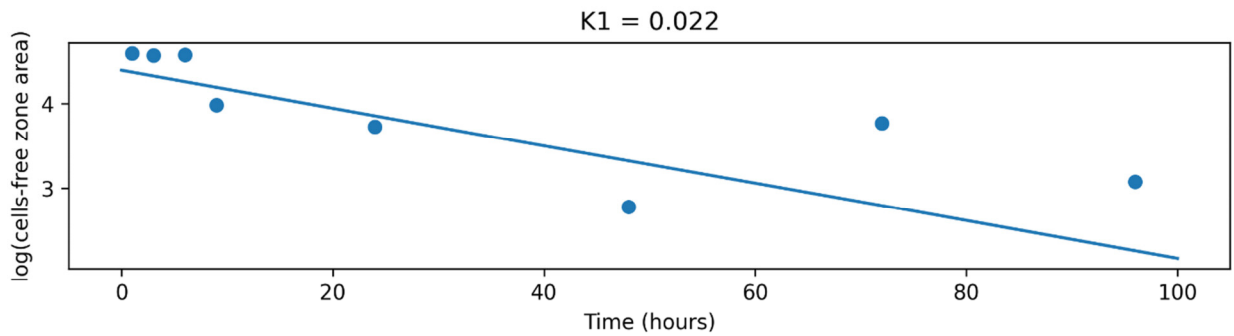

Figure 22. Linear regression between time and logarithm of cell-free zone area.

### 4.4 Neural network processing time

Here, we present the histogram of the neural network processing time for 400 images. The mean time is equal to 0.78 seconds.

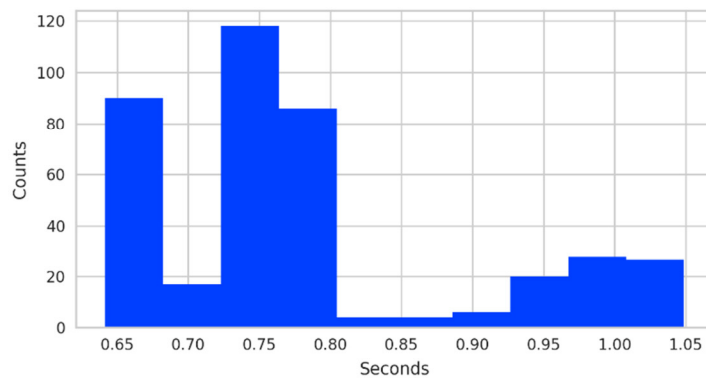

Figure 23. Model processing time distribution.

## 4.5 Method limitations

Restrictions and possible problems of the approach in solving applied tasks.

- It is necessary to retrain neural networks on a new annotated dataset of biofilm images if other species of bacteria are being studied.
- The difference between the results and quantitative data is due to the impossibility of reconstructing 3D images by SEM.
- Transfers, fixations and rinses can change the quantitative characteristics of biofilms. Therefore, additional validation steps are required.
- When SEM is used, it is impossible to distinguish dead cells from living cells. Therefore, the biocide effect can only be judged by an increase in the proportion of the matrix since the dead cell will be registered by the neural network as a matrix.
- We are not able to observe the change in the same sample before antibiotic treatment and after treatment, since it is necessary to inactivate and fix the biofilm.

## 5 Channel zone recognition

Here, an explanation of difference between channel zone and cell-free zone is shown.

Channels are observed when surface bacteria cells are in contact with each other and some space is left between them. The cells of the biofilm lower layer should be located in the area of this space. Most channels have convex shape. Channels are characterized by lower size compared to cell-free zone, which is actually an empty area of the support, where there are no biofilms. Cell-free zone is characterized by a large area, which can be of any shape. Visual differences can be seen on **Figure 24**.

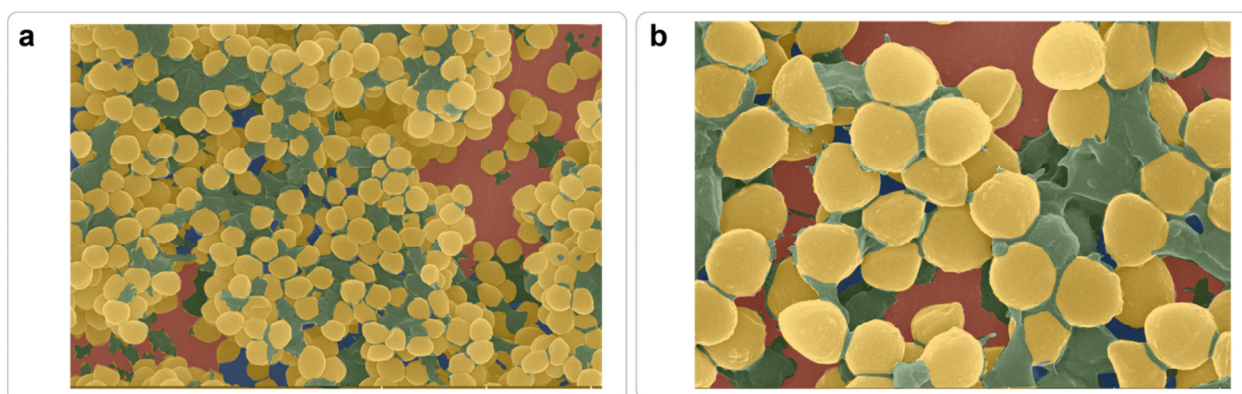

Figure 24. Annotated SEM images where the difference between channels and cell-free zone is clearly seen. (yellow — cells, green — matrix, blue — channels, red — cell-free zone). a — a big field of view; b — a small field of view.

## References

1. Ronneberger, O., Fischer, P. & Brox, T. U-Net: Convolutional Networks for Biomedical Image Segmentation. *Lect. Notes Comput. Sci. (including Subser. Lect. Notes Artif. Intell. Lect. Notes Bioinformatics)* 234–241 (2015) doi:10.1007/978-3-319-24574-4\_28.
2. He, K., Zhang, X., Ren, S. & Sun, J. Deep residual learning for image recognition. in *Proceedings of the IEEE Computer Society Conference on Computer Vision and Pattern Recognition* (2016). doi:10.1109/CVPR.2016.90.
3. Kingma, D. P. & Ba, J. L. Adam: A method for stochastic optimization. in *3rd International Conference on Learning Representations, ICLR 2015 - Conference Track Proceedings* (2015).
